# Supplementary material for: A Synthetic Small RNA Homologous to the D-Loop Transcript of mtDNA Enhances Mitochondrial Bioenergetics
Source: Front Physiol. 2022 Apr 6;13:772313. doi: 10.3389/fphys.2022.772313 (PMC9020786; doi:10.3389/fphys.2022.772313)
Supplement: Supplementary Table 1 — Linescan analysis of green FAM-labelled mmu-CR805 and red (Tom20) signals. [file Table_1.xlsx]

## Sheet: nuclear
Supplementary Table1 - Linescan analysis of FAM-labelled mmu-CR805 and red (Tom20) signals
	Transfected with CR805																									Transfected with non-targeting RNA
	Scan 1 CR nuclear line cell 1			Scan 1 CR nuclear line cell 2			Scan CR nuclear line cell 3			Scan CR nuclear circle cell 2			Scan CR nuclear circle cell 2			Scan CR nuclear circle cell 1			Scan CR nuclear circle cell 3			Scan CR nuclear circle cell 4				Cell 5 nuclear line			Cell 6 nuclear line			Cell 5 nuclear circle			Cell 6 nuclear circle			Cell 7 nuclear line			Cell 7 nuclear circle
	Distance_(pixels)	Gray_Value		Distance_(pixels)	Gray_Value		Distance_(pixels)	Gray_Value		Distance_(pixels)	Gray_Value		Distance_(pixels)	Gray_Value		Distance_(pixels)	Gray_Value		Distance_(pixels)	Gray_Value		Distance_(pixels)	Gray_Value			Distance_(pixels)	Gray_Value		Distance_(pixels)	Gray_Value		Distance_(pixels)	Gray_Value		Distance_(pixels)	Gray_Value		Distance_(pixels)	Gray_Value		Distance_(pixels)	Gray_Value
		36.2372		0	27.25		0	18.25		0	36.5		0	31.463		0	30.4855		0	20.0878		0	30.9195			0	3.5		0	4.25		0	11.5278		0	2.60406		0	1.75		0	2.01388
	1	40.675		1	29.5		1	17.5		1	37.75		1	28.6124		1	27.2529		1	23.0074		1	27.4914			1	2.75		1	4.25		1	9.0227		1	2.96562		1	1		1	1.58446
	2	36.5436		2	34.25		2	16		2	32		2	26.2076		2	25.602		2	28.2942		2	24.224			2	2		2	4		2	4.7077		2	3.56174		2	0.5		2	0.87847
	3	34.3881		3	34.25		3	20.75		3	26		3	29.6962		3	27.804		3	28.0706		3	26.9731			3	2.75		3	3.75		3	3.6705		3	5.57437		3	0.5		3	1.16321
	4	30.0143		4	31.25		4	24.5		4	23.25		4	31.6755		4	28.6637		4	29.2347		4	31.3912			4	3.75		4	5.5		4	5.6045		4	3.21026		4	0.75		4	1.11263
	5	21.7046		5	30.5		5	28.75		5	20.75		5	28.4605		5	32.3746		5	28.8754		5	29.7178			5	2.75		5	2.75		5	3.2739		5	3.20931		5	2.25		5	1.69965
	6	20.7439		6	26.75		6	29.75		6	16.5		6	30.5401		6	28.4615		6	27.1845		6	30.5654			6	3.75		6	1.5		6	2.0606		6	3.90274		6	3.5		6	1.15042
	7	24.3464		7	24.25		7	29.25		7	14.5		7	30.2613		7	30.0732		7	32.6683		7	30.8358			7	2.75		7	1		7	2.8286		7	2.44483		7	4		7	0.99999
	8	19.9297		8	24.25		8	22.5		8	17		8	25.501		8	30.901		8	29.2374		8	28.9947			8	1.5		8	1.5		8	2.766		8	1.74794		8	6.75		8	1.74694
	9	21.0605		9	22		9	20.5		9	17.75		9	19.4844		9	36.3204		9	30.1112		9	31.2417			9	0.75		9	3.25		9	3.0745		9	2.81896		9	7.5		9	2.05207
	10	19.9294		10	25.75		10	26.5		10	19.75		10	22.8231		10	34.7678		10	29.1194		10	31.0921			10	0.75		10	3.25		10	2.9099		10	2.80889		10	4.25		10	3.16363
	11	16.8129		11	30.75		11	25		11	19		11	22.2618		11	34.5371		11	27.045		11	26.8855			11	0.75		11	2.75		11	4.1444		11	2.54148		11	3.5		11	3.68602
	12	16.8382		12	33.5		12	21		12	20.5		12	22.7674		12	29.393		12	24.6934		12	29.0503			12	0		12	3		12	4.6452		12	3.44761		12	2.5		12	2.34028
	13	15.4736		13	26.5		13	16.5		13	21.25		13	23.009		13	28.5826		13	29.3281		13	28.3081			13	0.5		13	5.25		13	3.0839		13	4.93281		13	2.5		13	2.06693
	14	14.472		14	23.5		14	16.75		14	20.75		14	22.9648		14	29.5684		14	27.0985		14	31.8105			14	1		14	5.5		14	4.741		14	5.71372		14	4.25		14	2.28358
	15	20.6765		15	22.75		15	16.5		15	20.5		15	24.1932		15	26.0726		15	20.5548		15	33.7438			15	0.5		15	6.75		15	6.0143		15	5.93411		15	3		15	2.20024
	16	23.089		16	21.5		16	15.75		16	15.5		16	26.607		16	29.1744		16	21.7496		16	37.104			16	0.5		16	3.5		16	4.0268		16	6.32965		16	2.25		16	3.29481
	17	18.4452		17	19		17	15.75		17	14.75		17	22.7667		17	31.5275		17	17.795		17	45.7388			17	0.75		17	1.75		17	5.5946		17	9.54098		17	2.5		17	1.58656
	18	12.352		18	17.75		18	15.25		18	11.25		18	20.2472		18	35.2726		18	20.6019		18	46.4299			18	2		18	1.5		18	4.6587		18	7.80498		18	1.75		18	1.27586
	19	9.2099		19	19.75		19	17		19	14		19	22.0262		19	32.5845		19	23.6258		19	41.7833			19	2.5		19	2.25		19	4.0342		19	6.93711		19	1.5		19	1.04599
	20	5.4391		20	20.5		20	17.25		20	13		20	23.5495		20	29.7923		20	20.3253		20	45.3287			20	2		20	3		20	6.6414		20	4.15491		20	0.75		20	2.53289
	21	5.3049		21	19.75		21	12.25		21	13		21	20.3843		21	35.3612		21	27.288		21	38.0064			21	1.75		21	2.75		21	6.5615		21	1.98717		21	1		21	3.93085
	22	7.5141		22	18.5		22	14.25		22	13		22	21.294		22	38.4331		22	30.2658		22	39.3602			22	2		22	1.75		22	6.3706		22	2.23985		22	1		22	4.39011
	23	9.7071		23	14.25		23	13.5		23	10		23	22.4677		23	35.3132		23	34.721		23	39.7295			23	2.5		23	1.5		23	4.5636		23	3.43571		23	1		23	6.06021
	24	5.1929		24	11.75		24	15.5		24	11.5		24	27.6248		24	31.026		24	37.2472		24	36.0258			24	2		24	2.25		24	5.4026		24	3.78349		24	1.25		24	3.1709
	25	7.3303		25	10.25		25	14		25	12		25	33.4026		25	25.0579		25	33.3198		25	42.2756			25	2		25	2.25		25	3.9091		25	4.082		25	1.5		25	1.34533
	26	8.6537		26	13.5		26	17.5		26	13.75		26	32.1392		26	24.6182		26	37.4106		26	40.4275			26	1.75		26	1.75		26	3.3125		26	3.67327		26	1.75		26	1.13627
	27	8.9769		27	9.75		27	14.25		27	11.25		27	31.5205		27	25.8366		27	37.5416		27	40.4146			27	2.5		27	1.75		27	3.4966		27	2.47067		27	2.25		27	1.11423
	28	13.557		28	8.25		28	13.75		28	9.75		28	31.5135		28	28.6404		28	32.0172		28	39.9229			28	1.25		28	2.25		28	2.9929		28	2.46932		28	2.25		28	1.9361
	29	15.7489		29	12		29	15.75		29	8.5		29	29.8287		29	29.104		29	28.8743		29	42.6099			29	1.25		29	3		29	3.2914		29	3.48443		29	3		29	1.87181
	30	15.7975		30	13.25		30	17.75		30	6.75		30	28.8586		30	26.3137		30	23.2825		30	47.2729			30	1.5		30	2.75		30	2.1326		30	2.41413		30	4		30	1.71247
	31	20.341		31	11.5		31	16		31	6.25		31	22.7635		31	28.0546		31	24.2087		31	50.5193			31	1		31	2.75		31	3.3522		31	2.37255		31	3.25		31	2.0609
	32	21.837		32	15		32	9.5		32	7.25		32	22.607		32	24.9531		32	20.4745		32	50.0629			32	0.5		32	2		32	3.8761		32	2.48197		32	2.5		32	2.37729
	33	15.2206		33	17.25		33	12.25		33	6.5		33	25.2575		33	26.5096		33	16.5197		33	45.9476			33	0.75		33	1.75		33	3.1637		33	3.83436		33	2.25		33	2.78736
	34	11.6067		34	22		34	14.75		34	12		34	26.187		34	30.0506		34	18.1157		34	42.2723			34	1.5		34	2		34	2.1788		34	3.124		34	1.75		34	3.05179
	35	14.9498		35	23.5		35	9		35	8.75		35	23.968		35	28.3479		35	16.5317		35	42.4647			35	1.5		35	2.5		35	2.4607		35	2.32779		35	2.5		35	4.08969
	36	16.3446		36	28.5		36	10.75		36	7.75		36	24.7797		36	31.9307		36	19.6741		36	42.8285			36	1.75		36	4		36	3.1044		36	2.62444		36	1.25		36	6.69616
	37	16.5699		37	30.25		37	10.5		37	10		37	24.1502		37	33.4349		37	18.0112		37	41.4656			37	0.5		37	3.5		37	2.1835		37	2.30248		37	1		37	7.91204
	38	13.9421		38	23		38	7.5		38	8.25		38	23.3534		38	32.8274		38	17.5024		38	43.875			38	1		38	4.25		38	1.3261		38	3.62886		38	0.5		38	7.28969
	39	16.1648		39	25.75		39	7.75		39	8		39	20.561		39	33.7909		39	20.5871		39	42.6282			39	0.5		39	3.25		39	2.0081		39	2.20581		39	1.25		39	5.71023
	40	15.8794		40	26.75		40	10.25		40	6.5		40	18.6713		40	31.6266		40	23.1038		40	37.5771			40	1.25		40	4		40	1.627		40	1.84528		40	1.25		40	6.47107
	41	11.6263		41	25.25		41	8.5		41	7.75		41	17.0849		41	29.098		41	24.4766		41	40.856			41	2		41	5		41	2.2843		41	1.97632		41	2		41	5.50808
	42	12.0501		42	21.5		42	6.25		42	12.75		42	17.1066		42	27.7261		42	26.6667		42	39.585			42	4.5		42	3.25		42	2.1771		42	1.77018		42	1.25		42	3.93819
	43	12.7442		43	24		43	6.75		43	15		43	18.1782		43	24.7609		43	29.9108		43	41.7899			43	7.75		43	1.75		43	1.8718		43	2.00697		43	1.25		43	4.00986
	44	18.4546		44	28.5		44	10.25		44	16.5		44	18.3074		44	27.7579		44	29.8846		44	45.5194			44	8.75		44	1.75		44	2.6486		44	3.86164		44	1.75		44	1.14495
	45	12.814		45	25.75		45	8.5		45	20		45	19.4389		45	28.5951		45	34.4464		45	38.863			45	7.75		45	1		45	3.9762		45	2.75495		45	1.75		45	0.9214
	46	14.2913		46	25		46	13		46	20.5		46	20.1993		46	22.9563		46	31.699		46	39.5832			46	3.75		46	1.25		46	4.0181		46	1.75058		46	1.25		46	2.40408
	47	10.5141		47	24.25		47	15.5		47	23		47	18.708		47	26.0309		47	33.1565		47	40.289			47	2		47	2		47	3.3439		47	1.06961		47	1.25		47	2.52972
	48	12.4613		48	23		48	16.5		48	24.25		48	17.5618		48	24.3481		48	30.4467		48	38.6566			48	3.5		48	1.5		48	1.9969		48	0.99352		48	1.25		48	2.39002
	49	13.8724		49	22.25		49	18.25		49	24.25		49	19.1906		49	21.8608		49	27.4123		49	41.7908			49	5.5		49	2.5		49	2.2923		49	0.93362		49	1.5		49	1.95569
	50	14.7341		50	22		50	16.75		50	23.5		50	25.0637		50	28.3868		50	27.71		50	42.6596			50	4.25		50	2.75		50	1.7955		50	1.93804		50	4		50	2.34987
	51	11.822		51	18.75		51	16.25		51	27.75		51	27.9926		51	25.0753		51	33.0276		51	40.9412			51	3.5		51	1.75		51	3.1132		51	2.42818		51	5		51	2.89118
	52	14.9313		52	17.75		52	15		52	31.75		52	23.4187		52	25.3284		52	33.3532		52	39.4673			52	4.5		52	0.75		52	3.4458		52	2.21802					52	3.3756
	53	17.7638		53	20		53	22.5		53	30.5		53	25.5093		53	25.9941		53	33.6058		53	40.3473			53	4.5		53	0.75		53	5.376		53	1.96793					53	1.80198
	54	17.2943		54	25.75		54	27.5		54	38.5		54	26.7013		54	26.3828		54	33.7272		54	39.666			54	6		54	0.75		54	4.4226		54	0.71791					54	1.33691
	55	20.6471					55	31					55	28.6982		55	29.2743		55	34.9705		55	39.0036			55	4		55	2		55	5.3245		55	0.66427					55	1.4174
	56	22.664					56	37					56	27.09		56	26.7653		56	31.7065		56	40.3772			56	2					56	9.3678		56	0.65944					56	1.64818
	57	22.0403					57	45.25					57	19.7853		57	24.8416		57	31.2633		57	38.119			57	3.75					57	8.8746		57	1.70229					57	1.82847
	58	22.1818											58	20.284		58	20.269		58	26.3276		58	43.0509			58	2					58	8.9787		58	2.7672					58	3.26846
	59	19.8563											59	22.3658		59	20.3307		59	23.4339		59	40.1999			59	3.5					59	8.1618		59	1.74162					59	1.30197
													60	21.4117		60	19.7794		60	21.9578		60	36.7971			60	6.5					60	4.303		60	1.96641					60	1.07462
													61	18.6696		61	22.5905		61	22.8635		61	36.7292									61	4.4682		61	1.71914					61	1.43807
													62	16.3555		62	21.9573		62	21.7869		62	39.6									62	4.1497		62	0.54904					62	1.79457
													63	11.3538		63	24.7284		63	20.0596		63	37.9018									63	2.208		63	0.46309					63	2.37539
													64	9.4356		64	23.7052		64	18.9059		64	34.3005									64	6.5424		64	1.15476					64	2.42816
													65	10.4032		65	23.8206		65	20.056		65	28.4448									65	4.3387		65	1.13688					65	1.55763
													66	14.3193		66	25.3272		66	22.8069		66	29.0414									66	1.8745		66	0.92349					66	0.92632
													67	13.8566		67	22.3225		67	17.3244		67	27.6654									67	3.3218		67	1.81383					67	0.32391
													68	9.8686		68	22.087		68	23.304		68	25.0309									68	3.7324		68	2.65403					68	0.83194
													69	8.5242		69	20.5007		69	20.837		69	26.9304									69	4.0554		69	3.87799					69	1.10156
													70	9.3115		70	22.6913		70	21.3632		70	29.5158									70	6.6022		70	3.88169					70	0.65909
													71	11.7852		71	21.0056		71	19.9754		71	30.9759									71	9.1973		71	3.32638					71	1.89585
													72	13.1289		72	26.0832		72	17.8471		72	29.0851									72	9.9801		72	3.01					72	2.43439
													73	12.1446		73	22.8895		73	17.9584		73	22.0408									73	5.0938		73	2.51042					73	1.99607
													74	14.8759		74	22.5487		74	19.6033		74	24.3996									74	3.1362		74	1.66957					74	1.65164
													75	15.4095		75	17.4214		75	24.5118		75	24.9283									75	2.5929		75	0.76576					75	1.61636
													76	19.2181		76	14.6072		76	22.1725		76	19.9446									76	1.6288		76	0.98298					76	1.1005
													77	16.5181		77	14.765		77	23.1449		77	23.5396									77	0.4681		77	0.50183					77	1.08346
													78	17.932		78	18.1004		78	23.6215		78	23.5625									78	0.2847		78	0.7725					78	1.04762
													79	21.8983		79	16.3859		79	27.8828		79	25.2071									79	0.4925		79	1.03764					79	1.73908
													80	16.0954		80	15.6422		80	24.3832		80	28.3861									80	1.2773		80	0.62186					80	2.61798
													81	25.6016		81	17.7032		81	20.7215		81	26.736									81	3.0659		81	0.8689					81	3.10817
													82	29.93		82	19.9788		82	18.6041		82	24.9504									82	4.1522		82	1.69757					82	4.44163
													83	26.8232		83	17.927		83	19.718		83	21.6756									83	4.3698		83	1.96118					83	5.27815
													84	27.4364		84	21.265		84	22.0433		84	17.7807									84	3.9683		84	2.63932					84	3.54718
													85	27.2103		85	25.225		85	22.5657		85	19.5879									85	2.8798		85	3.67413					85	1.72413
													86	23.3956		86	26.0886		86	19.8281		86	20.2052									86	1.721		86	5.60413					86	1.46819
													87	23.1281		87	22.6256		87	18.6633		87	23.1071									87	1.1234		87	5.04015					87	1.22725
													88	23.1098		88	17.5714		88	15.4221		88	19.3027									88	1.2461		88	4.87666					88	0.66909
													89	19.9408		89	21.2498		89	13.1499		89	18.3159									89	1.1302		89	5.65534					89	0.99937
													90	17.5379		90	23.6351		90	15.8615		90	23.3567									90	0.8735		90	5.15268					90	0.41321
													91	18.9517		91	21.8048		91	17.0289		91	19.5202									91	1.7427		91	3.89354					91	0.67779
													92	20.6625		92	19.1394		92	20.8287		92	13.6196									92	3.1202		92	4.31179					92	2.145
													93	20.2516		93	21.2695		93	20.8794		93	15.3387									93	5.2415		93	3.90289					93	3.99464
													94	19.7438		94	22.6626		94	18.3935		94	16.0693									94	5.7536		94	3.28472					94	5.57989
													95	17.8348		95	24.1404		95	17.3484		95	19.2605									95	5.093		95	2.96688					95	6.85376
													96	22.1721		96	27.2694		96	18.4863		96	23.6033									96	4.1739		96	2.11613					96	1.85865
													97	17.6399		97	29.0358		97	22.7257		97	22.0621									97	3.386		97	1.9835					97	1.06421
													98	20.7974		98	28.6559		98	26.8566		98	16.292									98	4.5984		98	2.73663					98	0.53279
													99	21.5171		99	18.7546		99	22.9813		99	15.7804									99	7.7084		99	3.72173					99	0.97882
													100	24.4839		100	16.5946		100	15.2174		100	13.2064									100	10.3987		100	2.84126					100	0.6486
													101	20.5182		101	17.8677		101	15.2504		101	16.1773									101	4.6009		101	2.38108					101	0.69842
													102	25.2343		102	16.2497		102	15.9856		102	14.061									102	3.504		102	2.33382					102	0.94251
													103	26.7277		103	13.839		103	14.9602		103	15.66									103	3.0927		103	1.59999					103	1.16286
													104	26.3371		104	21.7421		104	16.2962		104	18.6885									104	1.7612		104	1.25672					104	1.90106
													105	25.7939		105	20.0183		105	19.648		105	18.5186									105	1.4619		105	0.57059					105	1.83642
													106	27.7339		106	18.8556		106	15.8307		106	22.7443									106	0.7824		106	0.86796					106	1.2347
													107	28.6655		107	21.1113		107	17.7889		107	22.0177									107	1.2475		107	1.78055					107	1.44838
													108	28.6347		108	18.9259		108	12.846		108	24.5354									108	1.1831		108	2.19644					108	1.49299
													109	26.1993		109	23.8589		109	10.3162		109	25.4927									109	0.6393		109	2.38248					109	1.29994
													110	28.3232		110	17.8955		110	13.4383		110	26.4417									110	1.5257		110	2.04837					110	1.7715
													111	29.7869		111	20.1741		111	16.1878		111	22.9409									111	1.3504		111	2.6608					111	2.5691
													112	27.5264		112	24.4266		112	15.2521		112	25.264									112	0.8581		112	4.3052					112	2.59075
													113	22.2106		113	27.7095		113	13.7984		113	28.9659									113	1.2794		113	4.59509					113	1.79142
													114	25.9499		114	29.9143		114	15.3948		114	27.376									114	2.0435		114	3.66238					114	2
													115	30.2053		115	33.9465		115	16.1992		115	26.1991									115	1.6075		115	3.55583					115	1.58789
													116	29.8493		116	30.6823		116	13.9524		116	29.5971									116	1.0551		116	4.69301					116	1.62224
													117	27.9072		117	32.4569		117	13.8412		117	26.417									117	0.25		117	3.8623					117	1.50904
													118	23.1587		118	35.5872		118	14.841		118	22.2733									118	0.1605		118	3.00169					118	1.41264
													119	27.5126		119	38.3477		119	17.9617		119	24.7653									119	0.3891		119	3.56732					119	1.1062
													120	31.7874		120	33.7511		120	20.0537		120	25.2431									120	1.0809		120	2.95601					120	1.16977
													121	33.205		121	29.8821		121	19.1618		121	21.9729									121	1.9268		121	1.85005					121	1.1936
													122	33.266		122	26.272		122	20.4523		122	19.4831									122	3.5598		122	2.7762					122	0.77387
													123	34.9394		123	28.5411		123	18.7638		123	20.347									123	4.8895		123	1.74942					123	0.96141
													124	33.637		124	31.092		124	17.4751		124	18.6935									124	4.4116		124	0.97901					124	1.03956
													125	31.6987		125	34.9198		125	17.9043		125	20.1288									125	4.9947		125	0.77378					125	0.75278
													126	36.5918		126	33.8109		126	17.3392		126	18.9439									126	5.1376		126	2.01687					126	1.17061
													127	32.2887		127	31.3028		127	16.719		127	20.4214									127	3.977		127	1.46674					127	1.51637
													128	35.5577		128	32.326		128	17.5286		128	25.5435									128	4.1368		128	1.98729					128	0.93705
													129	33.9932		129	32.1202		129	20.1198		129	24.5753									129	3.7014		129	1.3094					129	1.11509
													130	33.5454		130	24.4766		130	22.8221		130	26.0139									130	4.1095		130	2.26283					130	1.4246
													131	34.3454		131	23.6191		131	22.0969		131	24.3191									131	3.681		131	2.33589					131	1.29901
													132	34.2924		132	22.6623		132	24.3691		132	27.0769									132	3.6504		132	2.33964					132	1.48162
													133	34.3261		133	24.5486		133	22.6046		133	26.4962									133	2.5388		133	2.47045					133	1.56851
													134	37.5501		134	23.6424		134	24.9432		134	28.6646									134	2.9738		134	2.64284					134	1.94969
													135	43.138		135	21.2778		135	24.4076		135	30.6717									135	2.93		135	2.57556					135	2.81768
													136	45.6101		136	22.8809		136	22.4546		136	33.978									136	2.6862		136	3.45685					136	3.65655
													137	46.5327		137	25.5782		137	22.6023		137	28.153									137	2.2133		137	4.69592					137	4.2857
													138	43.8881		138	28.0069		138	24.0545		138	32.2582									138	1.4087		138	3.48803					138	3.19789
													139	41.5707		139	31.5547		139	26.5393		139	35.3502									139	2.2388		139	2.33589					139	3.05426
													140	33.5322		140	27.2495		140	32.5842		140	34.311									140	2.2551		140	2.25431					140	2.87324
													141	36.8736		141	25.7481		141	30.6547		141	34.2449									141	2.9066		141	1.99125					141	3.4567
													142	29.6497		142	26.7754		142	29.4329		142	31.5589									142	3.3799		142	3.31268					142	3.38446
													143	28.0324		143	26.547		143	29.9087		143	31.3182									143	5.5737		143	3.23766					143	2.16308
													144	25.2418		144	27.5611		144	29.5121		144	30.6861									144	4.6354		144	3.39413					144	0.55864
													145	24.563		145	29.0054		145	27.0605		145	30.6516									145	3.0458		145	3.37735					145	0.53554
													146	20.0261		146	31.4284		146	31.531		146	32.6322									146	1.8169		146	1.52733					146	1.20748
													147	20.4426		147	31.5272		147	30.8036		147	28.1097									147	3.3478		147	2.37257					147	1.96822
													148	22.6845		148	32.0367		148	33.6679		148	27.6339									148	5.7887		148	2.79056					148	1.28163
													149	19.943		149	30.2848		149	35.1969		149	31.565									149	9.98		149	2.83627					149	0.34779
													150	19.6755		150	31.8371		150	36.7974		150	32.0931									150	7.4628		150	2.28909					150	0.98765
													151	18.2152		151	32.0869		151	36.9869		151	30.9822									151	3.3086		151	4.00003					151	1.24604
													152	20.2721		152	29.6472		152	34.717		152	32.913									152	5.6887								152	0.83923
													153	22.0604		153	26.6554		153	34.0463		153	28.8661									153	4.2793								153	1.07919
													154	22.6391		154	30.9417		154	32.271		154	28.945									154	3.6107								154	2.39152
													155	28.7614		155	32.1637		155	32.2362		155	26.0527									155	3.8568								155	4.12962
													156	30.2592		156	31.5692		156	27.6864		156	23.9317									156	4.2278								156	4.08533
													157	32.1343		157	30.32		157	26.9279		157	24.6475									157	2.7579								157	4.1646
													158	33.9593		158	31.623		158	26.594		158	26.0389									158	2.3204								158	3.35683
													159	39.2493		159	31.5161		159	20.384		159	22.1192									159	1.6564								159	1.95975
													160	31.6751		160	28.2737		160	15.6368		160	24.2735									160	1.1638								160	2.31968
													161	31.9675		161	27.3549		161	19.5748		161	27.5192									161	1.9845								161	2.01167
													162	30.5249		162	26.6437		162	21.4208		162	27.1763									162	2.9235								162	1.75933
													163	32.4846		163	28.1261		163	19.7897		163	29.529									163	3.8859								163	1.40695
													164	31.6273		164	31.0112		164	25.0197		164	24.6556									164	4.8435								164	1.11047
													165	28.5186		165	23.2836		165	28.9936		165	20.6627									165	5.2239
																166	20.1338		166	29.4325		166	28.2942									166	4.4843
																167	18.2489					167	30.5662									167	4.0283
																168	17.0679					168	25.4574									168	7.5125
																169	14.2737					169	24.183									169	8.582
																170	15.8715					170	29.3392									170	11.2442
																171	15.6625															171	7.9151
																172	14.9358															172	4.8753
																173	15.947
																174	16.5345
																175	18.2533
																176	22.6168
																177	30.4067
																178	32.3218
																179	31.001
																180	33.3551
																181	29.7132
																182	29.741
																183	30.1407
																184	30.9239
																185	34.383
																186	36.1562
																187	32.5272
																188	31.0007
																189	32.6295
																190	34.2011
																191	34.0879
																192	27.8643
																193	28.0824
																194	31.1365
																195	30.128
																196	28.4201
																197	21.4297
																198	26.1077
																199	28.2683
																200	27.2961
																201	20.5849
																202	24.236
																203	22.4581
																204	24.8787
																205	27.2471
																206	27.9183
																207	30.6382
																208	26.4384
																209	24.7042
																210	24.6433
																211	26.0413

## Sheet: cytoplasm and dots mitochondria
Transfected with CR805															Transfected with non-targeting RNA
cytosol line scan cell 1			cell 1 line scan dot 1			cell 1 line scan dot 2			cell 1 line scan dot 3			cell 4 line scan dots				cell 5 line scan dots			cell 6 line scan dots			cell 7 line scan dots
Distance_(pixels)	Gray_Value		Distance_(pixels)	Gray_Value		Distance_(pixels)	Gray_Value		Distance_(pixels)	Gray_Value		Distance_(pixels)	Gray_Value			Distance_(pixels)	Gray_Value		Distance_(pixels)	Gray_Value		Distance_(pixels)	Gray_Value
0	1.75		0	2		0	74		0	39		0	59.75			0	14.25		0	11.5		0	13.5
1	1.5		1	3.25		1	73		1	43.75		1	60.25			1	16.75		1	11		1	13.5
2	3.25		2	3.75		2	66		2	49		2	58.75			2	14.5		2	9.25		2	17.75
3	2.25		3	4		3	63		3	52.5		3	61.25			3	18.25		3	7.75		3	14.5
4	2		4	4		4	50.5		4	52.75		4	56.5			4	13		4	10.25		4	13
5	2.25		5	4		5	45.5		5	50.75		5	58			5	8.25		5	13.25		5	14
6	2.25		6	3.5		6	46.5		6	57.25		6	65.5			6	8.25		6	18.75		6	12.75
7	1.5		7	3.5		7	50.75		7	51.5		7	70.5			7	12.25		7	18.75		7	17.75
8	2.75		8	3.25		8	58.75		8	52.5		8	72.75			8	17.75		8	26.5		8	23.75
9	2.5		9	2		9	57.25		9	58.25		9	83.25			9	21.5		9	34.25		9	29.5
10	2		10	2.75		10	59.25		10	54.75		10	89.5			10	21.75		10	45.5		10	38
11	2		11	2		11	59.25		11	58.5		11	87			11	28.5		11	53.5		11	52
12	2.5		12	2.75		12	63.25		12	63.25		12	101.75			12	39.25		12	62.25		12	67.5
13	2		13	2.5		13	55.5		13	67.25		13	124.5			13	52.5		13	77.75		13	84.75
14	1.25		14	1.5		14	55.5		14	70.5		14	133.5			14	68.75		14	86		14	98.5
15	1		15	2		15	56.75		15	74.25		15	146.75			15	88.5		15	102		15	105.25
16	1.25		16	5.5		16	63.25		16	74		16	144.5			16	106		16	98.75		16	101
17	2.5		17	15.75		17	58		17	71.25		17	131.75			17	119.25		17	90.75		17	95.75
18	7.5		18	34.5		18	61.5		18	72.75		18	113.25			18	110.5		18	76.25		18	91.75
19	25.75		19	48.5		19	62.5		19	86.25		19	107			19	102		19	67.75		19	78
20	45.75		20	63.75		20	64		20	82.5		20	97			20	79.5		20	64		20	64
21	47		21	65		21	64.25		21	84.5		21	93.5			21	75.5		21	61.25		21	49.75
22	49.75		22	67.75		22	58.75		22	87.5		22	87.25			22	83.75		22	58.5		22	37
23	47		23	72.25		23	54.25		23	88.75		23	85			23	88		23	61.25		23	29
24	52.5		24	77.25		24	57		24	91		24	89.75			24	90.75		24	73.75		24	26
25	53.25		25	82.25		25	61.5		25	92		25	89			25	107.25		25	83		25	27.25
26	60		26	81.5		26	64.25		26	98.25		26	85			26	125.75		26	91.5		26	28.75
27	72.75		27	87.25		27	59.75		27	103		27	84.5			27	137.5		27	106.25		27	27.5
28	70.25		28	80		28	57.25		28	98.5		28	77.5			28	142.25		28	123.25		28	34.25
29	64.75		29	80.75		29	66.5		29	93		29	79.5			29	137.75		29	136.25		29	46.25
30	73.5		30	76.75		30	62.5		30	90.5		30	81.25			30	112.25		30	154		30	62.75
31	76		31	77.25		31	65.75		31	89.25		31	80.5			31	91.25		31	160.75		31	78.5
32	77		32	75.75		32	64		32	91		32	81			32	74		32	155.5		32	88.25
33	77.5		33	76.5		33	60.5		33	96.5		33	79.75			33	69		33	136		33	95.25
34	76		34	84.5		34	67.75		34	109.5		34	84			34	66.75		34	115.75		34	89.5
35	79.5		35	93.5		35	69		35	138.75		35	91.5			35	71.75		35	92.25		35	71.5
36	82.25		36	97.75		36	73.25		36	152		36	98.25			36	79.25		36	76.25		36	53.5
37	79.5		37	98.25		37	78.75		37	167		37	103.25			37	93.75		37	60.75		37	39.25
38	84.25		38	108.25		38	76.75		38	167.5		38	109.5			38	111		38	48.5		38	30.75
39	78.5		39	124.5		39	80.25		39	148.75		39	122			39	130.75		39	29.25		39	23.25
40	80.5		40	136		40	87.75		40	137		40	133.5			40	137.5		40	7.5		40	16
41	80.5		41	160.5		41	94.5		41	131.75		41	137.75			41	114.5		41	2.5		41	9.75
42	78.25		42	179.5		42	91.25		42	130.5		42	133			42	91.75		42	1.25		42	6.75
43	81.25		43	172		43	102		43	130.75		43	115.5			43	75.5					43	5.5
44	87.5		44	141.75		44	121.5		44	122.5		44	99			44	49.25					44	5
45	83.25		45	124		45	137.75		45	113.5		45	90.25			45	36					45	7
46	82.5		46	114		46	147.5		46	114.5		46	82			46	25					46	9.5
47	82.25		47	107.25		47	147.75		47	111.5		47	77.5			47	18.75					47	5.25
48	81.5		48	99.5		48	134.25		48	114.5		48	72			48	10					48	4.5
49	89.75		49	93.5		49	115.5		49	129		49	66			49	6.75					49	5
50	91.25		50	95		50	102.5		50	149.75		50	66			50	10					50	5.25
51	83.75		51	94.75		51	99.25		51	162.5		51	65.25			51	8.75					51	6.75
52	81		52	95		52	90.5		52	154.75		52	68.5			52	12.25
53	76.25		53	93.5		53	86.75		53	148.75		53	64.75			53	22.25
54	76.5		54	102.75		54	84.5		54	126.5		54	62			54	24
55	72.75		55	115.25		55	81		55	120		55	69.75			55	15
56	68.5		56	124.75		56	77		56	105.75		56	73.75
57	67		57	118.25		57	72		57	95.25		57	73.75
58	63.25		58	108.5		58	74		58	86.5		58	69.25
59	66.75		59	93.25		59	72.75		59	80		59	68.5
60	63.5		60	79.5		60	75		60	82.25		60	75.5
61	50.75		61	64		61	75.25		61	82.75		61	84.25
62	45.5		62	34.75		62	80.25		62	77		62	89.75
63	29		63	13.25		63	78.5		63	71.75		63	86
64	21.5		64	5		64	71		64	72		64	81
65	13.75		65	1.5		65	62.75		65	62.75		65	81
66	8.5		66	1.25		66	66.5		66	57.75		66	77.5
67	4.75		67	1		67	59.25		67	45.75		67	74.5
68	2.5		68	0.75		68	63		68	38.5		68	71
69	2.25		69	1.5		69	64.75		69	34.25		69	71.75
70	2.25		70	1.25		70	69.5		70	27.75		70	71
71	2.25		71	0.75		71	64.75		71	18.5		71	69.5
72	3.5		72	0.5		72	62		72	10.5		72	74.25
73	3.75		73	0.5		73	56		73	6		73	77.75
74	4		74	0.5		74	54.75		74	4.75
75	3		75	1.75		75	59.75		75	5
76	1.5		76	2.25		76	63.5		76	5.5
77	2		77	2.75		77	64.25		77	5
78	4.25		78	3.5		78	59		78	2.75
79	4		79	2.25		79	64.25		79	2.25
80	3		80	2.5		80	59		80	3.5
									81	4
									82	2.75
									83	3.75
									84	3
									85	3.5
