# Supplementary material for: A Synthetic Small RNA Homologous to the D-Loop Transcript of mtDNA Enhances Mitochondrial Bioenergetics
Source: Front Physiol. 2022 Apr 6;13:772313. doi: 10.3389/fphys.2022.772313 (PMC9020786; doi:10.3389/fphys.2022.772313)
Supplement: Supplementary Table 2 — Metabolic analysis of TCA intermediates. [file Table_2.xlsx]

## Sheet: MLE12 Exp 1 Nov 17 FLUX
Table 2. Metabolic Flux of TCA intermediates
	2017-11-27
		11.801			12.767		16.691			17.09				19.726		21.014			21.485			22.048			22.598			25.497					23.531
		Lactate M0	Lactate M3	Pyruvate	Alanine M0	Alanine M3	Succinate M0	Succinate M2	Succinate M4	Fumarate M0	Fumarate M2	Fumarate M3	Fumarate M4	Serine M0	Serine M3	Mal/OAA M0	Mal/OAA M4	Mal/OAA M5	Aspartate M0	Asparate M2	Aspartate M4	alphaHG M0	alphaHG M2	alphaHG M4	Glu-ate M0	Glu-ate M2	Glu-ate M4	Citrate M0	Citrate M1	Citrate M2	Citrate M3	Citrate M5							Media
		261	264	265	260	263	289	291	293	287	289	290	291	390	393	419	423	424	418	420	422	434	436	438	432	434	436	459	460	461	462	464	327							200	201	205	242	243	247	331	332	337
Control 1	Sample 1	1709798	1005389	240006	238666	139393	128029	14601	861	186921	24995	19532	4425	395360	39748	287620	11879	4336	88615	16968	2236	399535	83219	7692	1932402	399205	49034	36630	15022	10847	5140	still not there	20731188					Control 1	Sample 1	228979	57305	185694	136523	42350	125803	21479	6706	19500
Control 2	Sample 2	2353747	1402563	337513	244586	130296	143172	15226	638	137191	17312	14026	3751	544539	41496	224428	9740	3584	130401	23108	2334	344116	68876	5546	1751264	349831	40337	28692	8936	8196	2815		19907460					Control 2	Sample 2	216758	57646	175069	129512	42566	119693	20802	6871	18906
Control 3	Sample 3	2283530	1259095	302690	262814	137761	167369	17790	859	172602	22079	17093	3952	452516	36004	229743	9694	3333	118330	23471	2779	374820	75555	6625	1871973	382973	55494	39985	17337	12084	4886		19818545					Control 3	Sample 3	229429	59797	185143	139245	44385	128333	22163	7247	20093
Control 4	Sample 4	2764242	1535615	374921	351223	172230	250624	29328	1766	245588	36628	22623	5349	699465	54092	369467	14162	4719	198394	38382	3730	431379	100261	11394	2417198	565672	74476	29419	14178	9857	2023		21280778					Control 4	Sample 4	186362	51647	152129	107981	36942	102342	17120	5825	15939
CR805 1	Sample 5	3440320	1978647	481801	353148	185089	240535	28499	1659	271907	40690	23723	6233	779510	61560	361266	14865	5930	217785	39189	4152	430724	98773	10539	2602271	592449	77065	49606	16737	16787	3943		22226980					CR805 1	Sample 5	229465	53860	187304	138681	40296	128392	21817	6564	19915
CR805 2	Sample 6	1681323	944121	232631	260272	148143	158937	19747	1423	211259	32605	19813	4760	451867	42323	340700	14198	4729	119006	22189	2876	421897	96546	10873	2146053	504094	63679	39706	16655	13851	5098		23273472					CR805 2	Sample 6	241899	62540	198380	143305	45888	134059	22306	7262	20472
CR805 3	Sample 7	2304616	1379039	333816	336769	191590	204250	24791	1360	259790	39624	25005	5448	553763	52453	421635	17630	6113	152653	29028	3890	474105	110996	12581	2479921	587402	75383	38057	13402	13867	4580		21063999					CR805 3	Sample 7	229935	54040	190757	135621	39389	128554	21394	6494	20091
																																						Control 1	Sample 1	44.7808			47.9567			47.5853
		Lactate	Pyruvate	Alanine	Succinate M2	Succinate M4	Fumarate M2	Fumarate M4	Serine	Malate M4	OAA	Aspartate M2	Aspartate M4	AlphaHG M2	AlphaHG M4	Glutamate M2	Glutamate M4	Citrate M1	Citrate M2	Citrate M3																		Control 2	Sample 2	44.6802			48.0299			47.6126
Control 1	Sample 1	37.0284	12.3092	36.8707	10.237	0.668011	11.7948	2.31256	9.1352	3.96629	1.48516	16.0708	2.46117	17.2384	1.88887	17.1215	2.47467	29.0831	22.8469	12.3055																		Control 3	Sample 3	44.6588			47.961			47.5506
Control 2	Sample 2	37.3389	12.5411	34.7565	9.6125	0.443641	11.205	2.66138	7.08081	4.15941	1.57185	15.0532	1.75839	16.6773	1.5861	16.6499	2.25145	23.7483	22.2186	8.93452																		Control 4	Sample 4	44.9433			48.6594			48.2138
Control 3	Sample 3	35.5413	11.704	34.3908	9.60796	0.510617	11.3411	2.23841	7.37002	4.04866	1.43001	16.5521	2.29463	16.776	1.73682	16.9837	2.87912	30.2449	23.2077	10.889																		CR805 1	Sample 5	44.9419			48.0737			47.7212
Control 4	Sample 4	35.7132	11.9433	32.9027	10.4761	0.699711	12.9787	2.13161	7.17822	3.69159	1.26114	16.2103	1.8454	18.8588	2.57333	18.964	2.98899	32.5206	25.0968	6.43407																		CR805 2	Sample 6	45.0578			48.3332			47.8564
CR805 1	Sample 5	36.5134	12.2842	34.388	10.5931	0.684988	13.0168	2.24096	7.31925	3.95208	1.61494	15.2502	1.8708	18.6541	2.38837	18.5446	2.87627	25.228	25.2843	7.36335																		CR805 3	Sample 7	45.3436			48.6624			48.4296
CR805 2	Sample 6	35.9604	12.1545	36.2727	11.0514	0.887378	13.3702	2.20351	8.56412	4.00059	1.36902	15.7151	2.35966	18.6223	2.51242	19.0214	2.88175	29.5506	25.8622	11.3784
CR805 3	Sample 7	37.4367	12.6521	36.2613	10.8238	0.661446	13.2339	2.054	8.65253	4.01352	1.42911	15.9775	2.48494	18.9704	2.58503	19.1503	2.95006	26.044	26.7063	10.7418
		Lactate	Pyruvate	Alanine	Succinate M2	Succinate M4	Fumarate M2	Fumarate M4	Serine	Malate M4	OAA		Aspartate M4		AlphaHG M4		Glutamate M4		Citrate M2	Citrate M3
Control 1	Sample 1	37.3732	12.6607	37.2181	0.216219	0.38574	1.8602	2.11469	6.16282	3.13562	1.38672		1.57588		0.904977		1.54235		5.10394	8.20156
Control 2	Sample 2	37.6779	12.8969	34.9766	-0.4397	0.149898	1.23976	2.47978	4.00189	3.33663	1.47697		0.836954		0.586508		1.30706		4.44127	4.65688
Control 3	Sample 3	35.8368	12.0334	34.6376	-0.445043	0.220519	1.38454	2.03826	4.31121	3.22452	1.32975		1.4019		0.745749		1.96876		5.48706	6.71809
Control 4	Sample 4	35.5222	12.1162	32.6179	0.461363	0.413586	3.06376	1.89947	4.05301	2.80987	1.13633		0.916752		1.60299		2.05563		7.37066	2.00572
CR805 1	Sample 5	36.7273	12.5984	34.5109	0.588717	0.402429	3.13525	2.03364	4.24261	3.11181	1.51876		0.952828		1.42575		1.95875		7.64324	3.00008
CR805 2	Sample 6	36.0458	12.4273	36.3825	1.06585	0.612748	3.49562	1.98877	5.53125	3.15369	1.25754		1.46089		1.55133		1.95894		8.22541	7.18655
CR805 3	Sample 7	37.1433	12.7939	35.9402	0.818329	0.372238	3.31352	1.81088	5.55707	3.12972	1.30469		1.57294		1.60794		2.00627		8.99961	6.44425
Flux		Lactate	Pyruvate	Alanine	Succinate M2	Succinate M4	Fumarate M2	Fumarate M4	Serine	Malate M4	OAA		Aspartate M4		AlphaHG M4		Glutamate M4		Citrate M2	Citrate M3
	Control	36.6025	12.4268	34.8626	-0.0517902	0.292436	1.88707	2.13305	4.63223	3.12666	1.33244		1.18287		0.960057		1.71845		5.60073	5.39556
	CR805	36.6388	12.6065	35.6112	0.824298	0.462472	3.3148	1.94443	5.11031	3.13174	1.36033		1.32889		1.52834		1.97465		8.28942	5.54363
	p -value C/CR805	0.960297	0.525192	0.563431	0.031755	0.144967	0.0350111	0.283998	0.530016	0.971316	0.807554		0.608049		0.0881456		0.276916		0.0212892	0.94156

## Sheet: MLE12 Absolute rates
Concentrations
		Lactate	Pyruvate	Alanine	Succinate	Fumarate	Serine	Malate	OAA	Aspartate	alphaKG	Glutamate	Citrate
Control 1	Sample 1	0.0824747	0.011577	0.0115124	0.00617567	0.00901642	0.0190708	0.0138738	0.000209153	0.00427448	0.0192722	0.0932123	0.0017669
Control 2	Sample 2	0.118234	0.0169541	0.0122861	0.00719188	0.00689144	0.0273535	0.0112736	0.000180033	0.00655036	0.0172858	0.0879702	0.00144127
Control 3	Sample 3	0.115222	0.0152731	0.013261	0.00844507	0.00870912	0.022833	0.0115923	0.000168176	0.00597067	0.0189126	0.0944556	0.00201755
Control 4	Sample 4	0.129894	0.0176178	0.0165042	0.011777	0.0115404	0.0328684	0.0173615	0.000221749	0.00932269	0.0202708	0.113586	0.00138242
CR805 1	Sample 5	0.154781	0.0216764	0.0158883	0.0108218	0.0122332	0.0350704	0.0162535	0.000266793	0.00979823	0.0193784	0.117077	0.00223179
CR805 2	Sample 6	0.072242	0.00999554	0.0111832	0.00682911	0.00907724	0.0194155	0.014639	0.000203193	0.00511338	0.0181278	0.0922103	0.00170606
CR805 3	Sample 7	0.10941	0.0158477	0.0159879	0.00969664	0.0123334	0.0262895	0.0200169	0.000290211	0.0072471	0.0225078	0.117733	0.00180673
Flux
		Lactate	Pyruvate	Alanine	Succinate M4	Fumarate M4	Serine	Malate M4	OAA	Aspartate M4	AlphaHG M4	Glutamate M4	Citrate M3	CitrateM2
Control 1	Sample 1	37.3732	12.6607	37.2181	0.38574	2.11469	6.16282	3.13562	1.38672	1.57588	0.904977	1.54235	8.20156	5.10394
Control 2	Sample 2	37.6779	12.8969	34.9766	0.149898	2.47978	4.00189	3.33663	1.47697	0.836954	0.586508	1.30706	4.65688	4.44127
Control 3	Sample 3	35.8368	12.0334	34.6376	0.220519	2.03826	4.31121	3.22452	1.32975	1.4019	0.745749	1.96876	6.71809	5.48706
Control 4	Sample 4	35.5222	12.1162	32.6179	0.413586	1.89947	4.05301	2.80987	1.13633	0.916752	1.60299	2.05563	2.00572	7.37066
CR805 1	Sample 5	36.7273	12.5984	34.5109	0.402429	2.03364	4.24261	3.11181	1.51876	0.952828	1.42575	1.95875	3.00008	7.64324
CR805 2	Sample 6	36.0458	12.4273	36.3825	0.612748	1.98877	5.53125	3.15369	1.25754	1.46089	1.55133	1.95894	7.18655	8.22541
CR805 3	Sample 7	37.1433	12.7939	35.9402	0.372238	1.81088	5.55707	3.12972	1.30469	1.57294	1.60794	2.00627	6.44425	8.99961
ABSOLUTE RATES
		Lactate	Pyruvate	Alanine	Succinate M4	Fumarate M4	Serine	Malate M4	OAA	Aspartate M4	AlphaHG M4	Glutamate M4	Citrate M3	CitrateM2
Control 1	Sample 1	30.8234	1.46573	4.2847	0.023822	0.190669	1.1753	0.435029	0.00290038	0.0673605	0.174409	1.43766	0.144914	0.0901816
Control 2	Sample 2	44.5483	2.18655	4.29728	0.0107805	0.170893	1.09466	0.376157	0.00265903	0.0548235	0.101383	1.14982	0.0671182	0.0640107
Control 3	Sample 3	41.2919	1.83788	4.5933	0.018623	0.177514	0.984377	0.373797	0.00223631	0.083703	0.14104	1.8596	0.135541	0.110704
Control 4	Sample 4	46.1411	2.13461	5.38334	0.048708	0.219206	1.33216	0.487836	0.00251981	0.0854659	0.32494	2.33491	0.0277275	0.101894
CR805 1	Sample 5	56.8469	2.73088	5.48318	0.0435499	0.24878	1.4879	0.505777	0.00405195	0.0933602	0.276288	2.29324	0.0669556	0.170581
CR805 2	Sample 6	26.0402	1.24217	4.06873	0.0418452	0.180526	1.07392	0.461669	0.00255522	0.0747009	0.281222	1.80634	0.122607	0.140331
CR805 3	Sample 7	40.6386	2.02754	5.74608	0.0360946	0.223343	1.46093	0.626472	0.00378636	0.113993	0.361912	2.36204	0.11643	0.162599
																		0.77	1.77	2.77	3.77	4.77	5.77
																		0.77	1.77	2.77	3.77	4.77	5.77
		Lactate	Pyruvate	Citrate/Ac-CoA	Citrate/OAA	AlphaKG	Succinate	Fumarate	Malate	OAA (x10)	Alanine	Aspartate (x10)	Glutamate	Serine				0.77	1.77	2.77	3.77	4.77	5.77
	Control	40.7012	1.90619	0.0916976	0.0938251	0.185443	0.0254834	0.18957	0.418205	0.0257888	4.63965	0.728382	1.6955	1.14662				0.77	1.77	2.77	3.77	4.77	5.77
	CR805	41.1752	2.0002	0.157837	0.101998	0.306474	0.0404966	0.217549	0.531306	0.0346451	5.09933	0.94018	2.15387	1.34092
																		1	2	3	4	5	6
																		1	2	3	4	5	6
	Control SD	3.44373	0.165692	0.010141	0.0280363	0.0488355	0.0081924	0.0106991	0.0271901	0.00138634	0.257945	0.0725739	0.258201	0.0731839				1	2	3	4	5	6
	CR805 SD	7.26451	0.351069	0.00739043	0.0143798	0.0226623	0.00184148	0.0162605	0.0402185	0.00376456	0.42528	0.0926513	0.142804	0.109186
	p -value C/CR805	0.957614	0.827607	0.00552547	0.830775	0.0547887	0.188918	0.238804	0.0414213	0.0883132	0.427082	0.158929	0.233966	0.228034
2022-01-01
		Glucose to			Fumarate				Malate		Aspartate		Glutamine
Beas set1		Lactate	Alanine	Glycine	M+2	M+3	M+4	Serine	M+2	M+4	M+2	M+4	M+2	M+4
Control	Samples 1-5	38.0117	39.0231	7.02297	7.62209	3.9758	1.53145	2.24769	10.6721	1.22705	6.75012	1.10271	10.1309	5.95683
hsa-LDL1	Samples 6-10	40.4192	39.5115	7.58787	7.58379	4.25874	1.64883	2.74083	10.3381	1.31639	7.75428	1.22226	11.3351	2.17775
mmu-CR805	Samples 11-15	33.7212	40.3404	7.8832	7.63048	4.17602	1.57006	2.69528	10.5104	1.23414	8.27694	1.20648	11.8888	2.31211
Beas set 2
Control	Samples 21-25	19.0833	31.2042	3.04766	8.72746	3.71797	1.91999	6.11239	14.8896	0.823594	6.45403	3.37833	10.3619	1.10552
hsa-LDL1	Samples 26-30	13.8695	32.412	2.43199	9.93655	4.66244	2.79391	7.74075	13.9909	1.03301	8.56227	3.36673	7.33421	1.49813
mmu-CR805	Samples 31-35	14.4162	28.6017	2.47287	9.78042	4.98759	3.88268	3.97236	13.9556		6.25634	3.32393	11.0578	2.821
MLE12 set1	Samples 41-45	44.6273	46.2562	11.6583	9.29965	9.3865	3.30804	8.66936	13.358	2.11607	10.9004	2.2057	12.1456	3.31331
Control	Samples 46-50	44.7865	47.207	11.8477	8.66154	9.28952	3.3274	8.66185	13.1792	2.0789	10.3833	2.12698	12.5533	3.22896
mmu-CR805	Samples 51-55	44.4639	45.641	12.181	9.90297	10.2469	3.69408	9.2547	13.9645	2.25395	12.0224	2.56051	14.4278	4.11139
hsa-LDL1

## Sheet: MLE12 Glucose Standard curve
				200	201	205	242	243	247	331	332	337
			Std 0	86435	9221	147	58037	8608	326	10404	1564	1		6.65217	10
			Std 2	91466	73374	436	41839	50456	974	6988	8483	1		0.823765	5
			Std 3	49485	60246	370	17367	41829	805	3065	7411			0.413574	2.5
			Std 4	45445	71528	416	9922	44663	842	1589	7372	4		0.215545	1.25
			Std 5	34142	63226	345	5030	40945	712	841	6989			0.120332	0.625
			Std 6	28190	57385	281	2619	37608	664	465	6397	5		0.0726903	0.3125
			Std 7	25578	54985	286	1652	34601	607	272	5791			0.0469694	0.15625
			Std 8	24885	54908	265	1125	35637	670	238	6012	2		0.0395875	0.078125
			Std 9	22034	49268	254	989	32878	603	206	5552	2		0.0371037	0.0390625
			Std 10	24359	49608	299	2570	32310	583	491	5505	1		0.0891916	0.0195312
			Std 11	36297	78270	420	2028	49805	920	358	8312	2		0.0430703	0.00976562

## Sheet: BEAS absolute rates
Concentrations
		Lactate	Alanine	Succinate M2	Fumarate M2	Malate M2	AlphaHG M4	Citrate M2	CitrateM5
Control 1	Sample 1	12.216	151.44	3.70789	8.0548	14.7873	135.62	2.22295	2.22295
Control 2	Sample 2	11.5841	114.873	3.4345	8.31617	14.0558	141.269	1.90542	1.90542
Control 3	Sample 3	10.737	138.186	3.42437	7.99996	13.7454	119.589	1.99303	1.99303
Control 4	Sample 4	12.995	196.582	3.64316	8.95541	15.9076	132.421	2.12014	2.12014
Control 4	Sample 5	11.9526	138.322	3.17976	8.2475	13.5538	121.651	1.86637	1.86637
hsa-LDL1	Sample 1	13.5464	207.561
hsa-LDL1 2	Sample 2	14.5795	152.542	4.22634	9.76772	17.2051	193.449	2.56941	2.56941
hsa-LDL1 3	Sample 3	11.1599	165.191	3.4584	8.41489	14.2903	145.97	2.11081	2.11081
hsa-LDL1 4	Sample 4	11.375	135.751	3.9258	9.28935	16.1872	183.682	2.28554	2.28554
hsa-LDL1 5	Sample 5	16.0894	135.695	4.14798	10.0821	17.0866	194.802	2.42281	2.42281
Flux
		Lactate	Alanine	Succinate M2	Fumarate M2	Malate M2	AlphaHG M4	Citrate M2	CitrateM5
Control 1	Sample 1	36.3655	40.6789	6.87835	8.05376	10.8916	2.24971	16.7623	4.88764
Control 2	Sample 2	37.8385	40.6367	6.43482	7.99914	10.4454	2.22005	16.9369	4.87734
Control 3	Sample 3	38.6045	39.8081	7.63008	7.44653	10.3437	2.23955	16.9291	4.76858
Control 4	Sample 4	34.7908	41.0106	7.08277	7.33421	9.95795	2.10441	18.2573	4.71958
Control 4	Sample 5	31.6734	40.8796	6.6189	7.4411	10.0412	2.17994	16.2062	4.58505
hsa-LDL1	Sample 1	36.7078	40.9966
hsa-LDL1 2	Sample 2	37.1633	40.5017	6.17461	7.75313	10.1509	2.43578	14.5651	4.5252
hsa-LDL1 3	Sample 3	35.9551	40.4372	7.30534	7.45507	10.5382	2.41186	16.4797	6.12788
hsa-LDL1 4	Sample 4	39.1165	39.372	8.42194	7.73894	9.86589	2.33622	15.9679	4.71545
hsa-LDL1 5	Sample 5	41.1316	40.1841	6.15383	7.98065	10.2705	2.46196	16.7432	4.99225
ABSOLUTE RATES
		Lactate	Alanine	Succinate M2	Fumarate M4	Malate M4	AlphaHG M4	Citrate M2	CitrateM5
Control 1	Sample 1	4.44241	61.6042	0.255042	0.648714	1.46	3.05105	0.372618	0.1
Control 2	Sample 2	4.38324	46.6805	0.221003	0.665222	1.46818	3.13625	0.32272	0.092934
Control 3	Sample 3	4.14497	55.0091	0.261282	0.595719	1.42179	2.67825	0.337401	0.0950392
Control 4	Sample 4	4.52106	80.6196	0.258037	0.656809	1.58408	2.78669	0.38708	0.100061
Control 5	Sample 5	3.78581	56.5456	0.210465	0.613705	1.36096	2.65192	0.302467	0.0855739
hsa-LDL1	Sample 1	4.97261	85.0929	0.231591
hsa-LDL1 2	Sample 2	5.41823	61.7821	0.26096	0.76	1.54295	4.71199	0.374236	0.116271
hsa-LDL1 3	Sample 3	4.01255	66.7987	0.252648	0.757304	1.74647	3.52059	0.347856	0.129348
hsa-LDL1 4	Sample 4	4.44949	53.4479	0.330629	0.718897	1.59701	4.29121	0.364952	0.107774
hsa-LDL1 5	Sample 5	6.61785	54.528	0.25526	0.804617	1.75488	4.79596	0.405657	0.120953
		Lactate	Alanine	Succinate M4	Fumarate M4	Malate M4	AlphaHG M4	Citrate M2	CitrateM5
Control		4.2555	6.00918	0.241166	0.636034	0.145875	0.286083	0.344457	0.0964517
hsa-LDL1		5.09415	6.43299	0.266217	0.760205	0.166033	0.432994	0.373175	0.118586
Control SD		0.297742	1.26684	0.0236162	0.0298673	0.136096	0.265192	0.0349829	0.00601458
hsa-LDL1 SD		1.00336	1.28276	0.0376816	0.0429367	0	0	0.0242547	0.0090128
p -value C/CR805		0.110939	0.613386	0.243303	0.00273228	0.0299465	0.00117547	0.207742	0.00350915
