# Supplementary material for: A Synthetic Small RNA Homologous to the D-Loop Transcript of mtDNA Enhances Mitochondrial Bioenergetics
Source: Front Physiol. 2022 Apr 6;13:772313. doi: 10.3389/fphys.2022.772313 (PMC9020786; doi:10.3389/fphys.2022.772313)
Supplement: Supplementary Table 3 — Mitochondrial stress test kit data analysis. [file Table_3.xlsx]

## Sheet: MLE-12 mito stress test I
Experiment data															Time in min			mmu-ncR805FL							mmu-CR805 normalized to coefficient							C negative							H-LDL-1 normalized to coefficient
presented in figure 4A													RAW data	OCR %	1.35			166.624	160.402	163.569	158.409	151.715			131.957	154.335	130.666	128.744	123.339			131.265	141.129	133.279	121.735	108.719			151.736	146.398	145.855	132.916
															7.1			156.684	147.433	148.961	146.384	142.263			129.987	146.317	125.605	129.529	118.239			134.103	134.84	127.124	121.951	104.41			154.077	141.759	138.252	132.787
															12.85			154.207	142.135	140.871	139.931	136.536			125.899	147.89	121.904	119.799	114.225			131.165	133.264	123.074	111.793	101.402			149.004	139.846	135.311	119.74
															18.75	Oligomycin		100	100	100	100	100	Oligomycin		100	100	100	100	100	Oligomycin		100	100	100	100	100	Oligomycin		100	100	100	100	Oligomycin
															24.4333			98.0643	92.9675	93.9339	91.6609	87.5108			85.2936	91.941	88.0402	89.8244	99.6012			92.8006	92.288	91.8059	93.9385	98.6			103.875	94.1593	96.1585	93.5895
															31.0667			102.339	92.5626	95.1885	90.8864	86.8129			77.9039	89.417	81.6369	89.6401	99.4557			91.6572	90.9953	90.686	92.8979	98.9464			104.598	94.2926	96.1426	91.9602
															36.8833	FCCP		213.985	202.085	194.496	183.61	191.667	FCCP		243.444	237.779	155.946	180.85	198.664	FCCP		166.131	165.213	143.427	137.984	146.67	FCCP		236.419	159.802	171.599	153.158	FCCP
															42.5833			219.124	199.997	201.464	191.34	188.961			220.922	232.726	167.389	178.908	186.446			169.459	169.812	156.666	140.991	146.33			210.526	162.353	180.203	163.751
															48.2667			223.8	200.999	202.604	194.691	191.027			222.401	231.954	151.488	173.359	190.582			168.286	169.674	154.746	139.248	147.491			209.91	164.891	180.782	169.354
															54.1	AA Rotetone		86.477	75.104	86.9862	80.0657	83.3167	AA Rotetone		39.7212	61.0372	79.2691	65.8478	50.8638	AA Rotetone		79.6158	73.826	82.8519	91.2052	63.2463	AA Rotetone		65.8481	72.9715	69.6018	89.4491	AA Rotetone
															59.75			71.2829	62.5096	70.1188	63.045	63.8643			38.1017	57.3427	61.151	60.672	44.4631			64.5099	63.1522	67.1304	77.1933	52.8631			61.8762	63.613	61.7135	67.7249
	Table with average values of OCR% in each group MLE-12														65.4333			65.3215	55.2689	62.2704	55.1964	56.6821			36.8807	52.5461	56.251	56.5068	41.9638			58.8007	58.6091	61.8719	70.6987	48.3719			59.8114	58.1887	57.6735	60.3967
																	ave last 3	74.3605	64.2942	73.1251	66.1024	67.9544		ave last 3	38.2345	56.9753	65.5571	61.0089	45.7636		ave last 3	67.6421	65.1958	70.6181	79.6991	54.8271		ave last 3	62.5119	64.9244	62.9963	72.5235
	Time	Neg Control		Normalized HDL-1		mmu-ncR805FL		mmu-CR805
	min	Av	SD	Av	SD	Av	SD	Av	SD
	1.35	127.225	12.4387	144.226	7.99336	160.144	5.65339	133.808	11.9362				Calculation based on the RAW data
	7.1	124.486	12.411	141.719	9.02814	148.345	5.28205	129.936	10.2963
	12.85	120.14	13.4459	135.975	12.2303	142.736	6.74059	125.944	12.9717				Non-mito respiration							Basal Respiration												Proton leak													ATP production
	18.75	100	0	100	0	100	0	100	0				last 3 readings							first 3 readings						first read - last readin						3 readings after oli						3 after oli-last 3							Basel Resp - Proton leak
	24.4333	93.8866	2.75151	96.9457	4.74927	92.8275	3.81761	90.9401	5.42108				mmu-CR805	C neg	Normalized HDL-1	mmu-ncR805FL				mmu-CR805	C neg	Normalized HDL-1	mmu-ncR805FL			mmu-CR805	C neg	Normalized HDL-1	mmu-ncR805FL			mmu-CR805	C neg	Normalized HDL-1	mmu-ncR805FL			mmu-CR805	C neg	Normalized HDL-1	mmu-ncR805FL				mmu-CR805	C neg	Normalized HDL-1	mmu-ncR805FL
	31.0667	93.0366	3.411	96.7484	5.50593	93.5579	5.77473	87.6107	8.33058				39.7212	79.6158	65.8481	86.477				131.957	131.265	151.736	166.624			92.2357	51.6487	85.8877	80.1475			100	100	100	100			60.2788	20.3842	34.1519	13.523				31.9568	31.2646	51.7358	66.6245
	36.8833	151.885	12.9671	180.245	38.2181	197.169	11.4915	203.336	37.3102				38.1017	64.5099	61.8762	71.2829				129.987	134.103	154.077	156.684			91.8854	69.5932	92.2009	85.4016			85.2936	92.8006	103.875	98.0643			47.192	28.2907	41.9991	26.7814				44.6935	41.3026	50.2018	58.6202
	42.5833	156.651	13.1247	179.208	22.3967	200.177	11.8805	197.278	28.1239				36.8807	58.8007	59.8114	65.3215				125.899	131.165	149.004	154.207			89.0186	72.3643	89.1921	88.886			77.9039	91.6572	104.598	102.339			41.0231	32.8565	44.7869	37.0175				47.9955	39.5077	44.4052	51.8685
	48.2667	155.889	13.1575	181.234	20.2545	202.624	12.7326	193.957	33.5116				61.0372	73.826	72.9715	75.104				154.335	141.129	146.398	160.402			93.2977	67.3027	73.4268	85.2978			100	100	100	100			38.9628	26.174	27.0285	24.896				54.3348	41.1287	46.3983	60.4018
	54.1	78.149	10.4344	74.4676	10.4028	82.3899	4.92888	59.3478	14.9929				57.3427	63.1522	63.613	62.5096				146.317	134.84	141.759	147.433			88.974	71.6875	78.1459	84.9237			91.941	92.288	94.1593	92.9675			34.5983	29.1358	30.5463	30.4579				54.3757	42.5516	47.5995	54.4659
	59.75	64.9698	8.72026	64.2319	2.52008	66.1641	4.1897	52.3461	10.4506				52.5461	58.6091	58.1887	55.2689				147.89	133.264	139.846	142.135			95.3443	74.6546	81.6571	86.8658			89.417	90.9953	94.2926	92.5626			36.8709	32.3862	36.1038	37.2937				58.4734	42.2684	45.5533	49.5721
	65.4333	59.6705	8.00016	59.0176	1.18153	58.9479	4.5936	48.8297	8.91268				79.2691	82.8519	69.6018	86.9862				130.666	133.279	145.855	163.569			51.3973	50.427	76.2528	76.5826			100	100	100	100			20.7309	17.1481	30.3982	13.0138				30.6663	33.2789	45.8546	63.5688
													61.151	67.1304	61.7135	70.1188				125.605	127.124	138.252	148.961			64.4543	59.9937	76.5389	78.8425			88.0402	91.8059	96.1585	93.9339			26.8892	24.6755	34.445	23.8151				37.5651	35.3181	42.0939	55.0274
													56.251	61.8719	57.6735	62.2704				121.904	123.074	135.311	140.871			65.6533	61.2022	77.6373	78.6009			81.6369	90.686	96.1426	95.1885			25.3859	28.8141	38.4691	32.9181				40.2674	32.3881	39.1681	45.6828
													65.8478	91.2052	89.4491	80.0657				128.744	121.735	132.916	158.409			62.8963	30.5303	43.4671	78.3437			100	100	100	100			34.1522	8.79484	10.5509	19.9343				28.7442	21.7354	32.9162	58.4094
													60.672	77.1933	67.7249	63.045				129.529	121.951	132.787	146.384			68.857	44.7576	65.0621	83.3387			89.8244	93.9385	93.5895	91.6609			29.1523	16.7451	25.8647	28.6159				39.7047	28.0125	39.1974	54.7228
													56.5068	70.6987	60.3967	55.1964				119.799	111.793	119.74	139.931			63.292	41.0947	59.3433	84.735			89.6401	92.8979	91.9602	90.8864			33.1333	22.1992	31.5635	35.69				30.1587	18.8956	27.7798	49.0451
													50.8638	63.2463		83.3167				123.339	108.719		151.715			72.4751	45.4727		68.3986			100	100		100			49.1362	36.7537		16.6833				23.3389	8.71901		51.7154
													44.4631	52.8631		63.8643				118.239	104.41		142.263			73.7763	51.5467		78.3983			99.6012	98.6		87.5108			55.138	45.737		23.6464				18.6383	5.80976		54.7518
													41.9638	48.3719		56.6821				114.225	101.402		136.536			72.2613	53.0302		79.8537			99.4557	98.9464		86.8129			57.4919	50.5745		30.1308				14.7694	2.45569		49.7229
												Ave	53.5079	67.5964	65.739	69.1673				129.896	123.95	140.64	150.408		Ave	76.3879	56.3537	74.901	81.2411		Ave	92.8503	95.6411	97.898	95.4618		Ave	39.3424	28.0446	32.159	26.2945		Ave		37.0455	28.3091	42.742	54.9466
												SD	11.773	11.653	8.81494	10.9976				11.4069	12.2061	9.66762	9.29937		SD	14.1071	13.0993	13.5563	5.16147		SD	7.58875	3.97431	4.10321	4.98201		SD	12.1653	10.9054	8.84088	7.98758		SD		13.2567	13.7472	7.00669	5.75091
												p	0.00268122		0.651776	0.707032				0.179013		0.000707036	3.01415e-07		p value	0.000387141		0.00137268	1.94086e-07		p value	0.21745		0.160745	0.914022		p value	0.0122446		0.300573	0.619982		p value		0.087326		0.00289691	1.58738e-07
													c/CR805		c/HDL-1	C/ncR805FL				c/CR805		c/HDL-1	C/ncR805FL			c/CR805		c/HDL-1	C/ncR805FL			c/CR805		c/HDL-1	C/ncR805FL			c/CR805		c/HDL-1	C/ncR805FL				c/CR805		c/HDL-1	C/ncR805FL
Oligomycin
FCCP
AA Rotetone
[truncated: 21 more columns]

## Sheet: MLE-12 mito stress test II
												RAW data	OCR %	Time in min			mmu-ncR805FL							H-LDL-1							C negative							mmu-CR805
														1.35			153.587	167.56	155.549	150.933	159.698	153.225		148.242	141.954	155.528	143.258	139.697	138.332		154.995	162.005	150.702	155.802	158.726	152.515		179.167	168.054	164.921	170.112	152.895	150.286
														7.1			150.211	156.434	143.177	143.734	153.59	146.532		141.293	138.423	146.652	137.428	134.466	136.07		151.286	154.086	146.501	150.553	152.814	143.693		173.819	161.993	159.326	163.931	141.975	145.691
														12.85			149.757	152.063	136.641	141.637	152.291	146.423		138.464	136.644	143.603	136.3	135.6	136.341		151.106	152.081	143.78	150.803	149.939	145.552		171.657	159.592	158.075	161.522	140.786	146.321
														18.75		Oligomycin	100	100	100	100	100	100	Oligomycin	100	100	100	100	100	100	Oligomycin	100	100	100	100	100	100	Oligomycin	100	100	100	100	100	100	Oligomycin
														24.4333			97.617	100.42	92.8983	93.1325	99.665	95.7735		96.9781	99.0574	99.5405	93.9518	92.6329	94.0916		96.0385	100.607	94.5417	97.6529	95.0615	101.593		107.5	102.647	99.024	97.2901	97.73	93.5728
														31.0667			98.4994	100.411	93.2226	93.1556	100.351	98.6148		97.3773	98.2116	99.6182	93.4824	91.6261	93.1976		97.6212	102.448	95.8177	100.207	94.0111	105.275		111.404	106.161	101.583	99.1956	98.5573	93.2791
														36.8833		FCCP	189.743	184.496	181.861	189.701	198.777	209.445	FCCP	162.015	157.795	166.441	169.493	172.184	181.633	FCCP	158.935	159.315	156.153	157.999	160.85	162.301	FCCP	254.641	183.114	210.753	208.674	182.237	202.652	FCCP
														42.5833			215.044	211.217	187.332	205.325	220.35	210.545		180.912	181.237	187.204	187.85	186.749	187.228		157.526	161.229	150.02	154.39	168.13	163.262		257.818	201.95	230.07	237.385	198.651	205.007
														48.2667			220.659	216.759	185.134	207.293	227.255	214.449		184.632	184.73	196.885	193.017	190.255	189.644		162.111	160.751	157.835	154.709	165.688	167.097		264.575	214.529	242.804	248.968	205.642	211.104
														54.1		AA Rotetone	94.3405	90.3882	81.7083	83.1116	85.5357	82.4753	AA Rotetone	87.3223	88.0501	89.871	70.7439	81.5369	75.9127	AA Rotetone	76.2098	84.2543	85.8485	84.9879	74.5822	92.0367	AA Rotetone	63.0311	83.2791	72.1192	83.3515	80.6467	72.4443	AA Rotetone
														59.75			74.5195	69.6123	65.6896	65.5395	70.2935	67.3381		73.5179	71.8619	73.8716	61.6003	67.0384	63.3807		63.908	68.9442	66.6695	71.8785	60.1845	81.5435		61.2988	69.4473	61.2898	63.062	67.705	60.9373
	Table with average values of OCR% in each group MLE-12													65.4333			65.6618	61.1199	58.6598	57.5217	60.4021	59.7203		66.5335	64.3989	65.7253	53.8471	59.1626	56.5385		58.2146	62.275	59.9243	63.8481	54.8396	71.8503		59.2152	61.8284	55.8581	54.5443	63.4546	56.5158
																ave last 3	78.1739	73.7068	68.6859	68.7243	72.0771	69.8446	ave last 3	75.7912	74.7703	76.4893	62.0638	69.246	65.2773	ave last 3	66.1108	71.8245	70.8141	73.5715	63.2021	81.8102	ave last 3	61.1817	71.5182	63.089	66.9859	70.6021	63.2991
	Time	Neg Control		HDL-1		mmu-ncR805FL	M-Long-805	mmu-CR805
	min	Av	SD	Av	SD	Av	SD	Av	SD
	1.35	155.791	4.11097	144.502	6.39929	156.759	6.05388	164.239	10.9153				Calculation based on the RAW data
	7.1	149.822	3.96006	139.055	4.37574	148.946	5.39478	157.789	11.9262
	12.85	148.877	3.37956	137.825	2.98889	146.469	6.25996	156.325	11.1119				Non-mito respiration							Basal Respiration												Proton leak													ATP production
	18.75	100	0	100	0	100	0	100	0					last 3 readings						first 3 readings						first read - last readin						3 readings after oli						3 after oli-last 3							Basel Resp - Proton leak
	24.4333	97.5825	2.94021	96.042	2.89839	96.5844	3.20717	99.6272	4.84095				HDL-1	C neg	mmu-CR805	mmu-ncR805FL				HDL-1	C neg	mmu-CR805	mmu-ncR805FL			HDL-1	C neg	mmu-CR805	mmu-ncR805FL			HDL-1	C neg	mmu-CR805	mmu-ncR805FL			HDL-1	C neg	mmu-CR805	mmu-ncR805FL				HDL-1	C neg	mmu-CR805	mmu-ncR805FL
	31.0667	99.2301	4.22677	95.5855	3.23023	97.3757	3.34422	101.697	6.34258				87.3223	76.2098	63.0311	94.3405				148.242	154.995	179.167	153.587			60.9196	78.7851	116.136	59.2461			100	100	100	100			12.6777	23.7902	36.9689	5.65952				48.2419	54.9949	79.1671	53.5866
	36.8833	159.259	2.15092	168.26	8.33749	192.337	10.1888	207.012	26.4166				73.5179	63.908	61.2988	74.5195				141.293	151.286	173.819	150.211			67.7748	87.3781	112.521	75.6917			96.9781	96.0385	107.5	97.617			23.4602	32.1305	46.2008	23.0974				44.3146	55.2476	66.3197	52.5942
	42.5833	159.093	6.48838	185.197	3.21367	208.302	11.4259	221.813	23.7507				66.5335	58.2146	59.2152	65.6618				138.464	151.106	171.657	149.757			71.9308	92.8918	112.442	84.0949			97.3773	97.6212	111.404	98.4994			30.8439	39.4066	52.189	32.8377				41.0869	53.4853	60.2528	51.2572
	48.2667	161.365	4.67443	189.86	4.75763	211.925	14.6988	231.27	24.0797				88.0501	84.2543	83.2791	90.3882				141.954	162.005	168.054	167.56			53.9043	77.751	84.7753	77.1714			100	100	100	100			11.9499	15.7457	16.7209	9.61184				41.9543	62.0053	68.0544	67.5596
	54.1	82.9866	6.51559	82.2395	7.62245	86.2599	5.056	75.812	8.05364				71.8619	68.9442	69.4473	69.6123				138.423	154.086	161.993	156.434			66.5614	85.1419	92.5457	86.8218			99.0574	100.607	102.647	100.42			27.1955	31.6625	33.1994	30.8079				39.3659	53.4795	59.3463	56.0139
	59.75	68.8547	7.41047	68.5451	5.31552	68.8321	3.40705	63.9567	3.69567				64.3989	62.275	61.8284	61.1199				136.644	152.081	159.592	152.063			72.2452	89.8056	97.7638	90.9432			98.2116	102.448	106.161	100.411			33.8127	40.1733	44.3321	39.291				38.4325	49.6323	53.4317	51.6522
	65.4333	61.8253	5.83516	61.0343	5.27139	60.5143	2.82493	58.5694	3.54044				89.871	85.8485	72.1192	81.7083				155.528	150.702	164.921	155.549			65.657	64.8531	92.802	73.8412			100	100	100	100			10.129	14.1515	27.8808	18.2917				55.528	50.7016	64.9212	55.5495
													73.8716	66.6695	61.2898	65.6896				146.652	146.501	159.326	143.177			72.7803	79.8318	98.0362	77.4873			99.5405	94.5417	99.024	92.8983			25.6688	27.8722	37.7341	27.2087				47.1115	51.9596	60.302	50.2786
													65.7253	59.9243	55.8581	58.6598				143.603	143.78	158.075	136.641			77.8779	83.8552	102.217	77.9816			99.6182	95.8177	101.583	93.2226			33.8929	35.8933	45.725	34.5628				43.9849	47.9619	56.4917	43.4187
													70.7439	84.9879	83.3515	83.1116				143.258	155.802	170.112	150.933			72.5139	70.8145	86.7605	67.8216			100	100	100	100			29.2561	15.0121	16.6485	16.8884				43.2578	55.8024	70.112	50.9332
													61.6003	71.8785	63.062	65.5395				137.428	150.553	163.931	143.734			75.8282	78.6745	100.869	78.1945			93.9518	97.6529	97.2901	93.1325			32.3515	25.7743	34.2282	27.593				43.4767	52.9002	66.6404	50.6015
													53.8471	63.8481	54.5443	57.5217				136.3	150.803	161.522	141.637			82.4531	86.9546	106.978	84.1155			93.4824	100.207	99.1956	93.1556			39.6353	36.359	44.6513	35.634				42.8178	50.5957	62.3266	48.4816
													81.5369	74.5822	80.6467	85.5357				139.697	158.726	152.895	159.698			58.1599	84.144	72.2487	74.1628			100	100	100	100			18.4631	25.4178	19.3533	14.4643				39.6968	58.7262	52.8954	59.6984
													67.0384	60.1845	67.705	70.2935				134.466	152.814	141.975	153.59			67.4278	92.6297	74.2699	83.2968			92.6329	95.0615	97.73	99.665			25.5945	34.8771	30.025	29.3715				41.8334	57.7527	44.245	53.9253
													59.1626	54.8396	63.4546	60.4021				135.6	149.939	140.786	152.291			76.4375	95.0997	77.331	91.8893			91.6261	94.0111	98.5573	100.351			32.4635	39.1714	35.1027	39.9487				43.9741	55.9283	42.2283	51.9406
													75.9127	92.0367	72.4443	82.4753				138.332	152.515	150.286	153.225			62.4195	60.4784	77.8419	70.7501			100	100	100	100			24.0873	7.96333	27.5557	17.5247				38.3322	52.5151	50.2862	53.2253
													63.3807	81.5435	60.9373	67.3381				136.07	143.693	145.691	146.532			72.6889	62.1491	84.7538	79.1935			94.0916	101.593	93.5728	95.7735			30.711	20.05	32.6355	28.4354				41.9779	42.0991	52.1183	50.7581
													56.5385	71.8503	56.5158	59.7203				136.341	145.552	146.321	146.423			79.8025	73.7021	89.8052	86.7023			93.1976	105.275	93.2791	98.6148			36.6591	33.425	36.7633	38.8945				43.1434	40.2771	53.0419	47.8078
												Ave	71.6721	69.1046	66.6754	72.2736				141.17	152.345	161.855	151.124		Ave	69.4981	83.2407	95.1796	78.8506		Ave	97.4984	98.2671	101.406	97.9582		Ave	25.8263	29.1625	34.7307	25.6846		Ave		43.2517	52.5592	59.0101	52.7379
												SD	10.8977	10.1542	9.3553	11.9946				5.65889	4.47682	10.7058	7.68151		SD	7.72546	8.34833	14.0079	8.55094		SD	3.04775	2.61537	3.9667	3.12077		SD	8.93119	8.99511	11.0888	10.6481		SD		4.04471	5.36172	9.41208	5.08876
												p	0.865894		0.136776	0.864832				2.01572e-07		0.00904399	0.705903		p value	0.00172824		0.00272142	0.654575		p value	0.0979932		0.239985	0.340955		p value	0.719874		0.0562027	0.638681		p value		1.23464e-06		0.016337	0.918887
													c/CR805		c/HDL-1	C/ncR805FL				c/CR805		c/HDL-1	C/ncR805FL			c/CR805		c/HDL-1	C/ncR805FL			c/CR805		c/HDL-1	C/ncR805FL			c/CR805		c/HDL-1	C/ncR805FL				c/CR805		c/HDL-1	C/ncR805FL
[truncated: 21 more columns]

## Sheet: MLE-12 mito stress test III
							RAW data	OCR %	Time in min		mmu-CR805											Control
									1.35		228.298	217.886	208.833	207.297	232.668	228.653	221.732	206.921				217.55	220.253	217.787	213.816	211.977	195.14
									7.1		235.733	225.828	216.45	213.361	234.977	238.442	228.64	211.55				221.16	221.937	218.163	222.896	213.178	196.957
									12.85		215.831	205.508	196.015	195.103	213.14	217.938	205.742	191.606				196.33	197.846	198.183	204.266	193.092	177.666
									18.75		90.7738	83.9027	87.696	81.6418	50.845	95.0588	87.4388	85.3932	Oligomycin			76.5253	85.1122	87.2378	81.0455	79.3438	80.6834
	Table with average values of OCR% in each group MLE-12								24.4333		82.6447	76.6103	80.387	74.2003	61.6973	87.8525	80.4698	77.724				70.5189	78.2693	81.5902	75.2994	73.0528	74.3215
									31.0667		75.9078	69.7497	75.0629	69.029	61.811	82.2741	74.94	72.8323				64.0195	71.8556	75.6298	70.7641	67.4602	68.9228
	Time	Scramble		mmu-CR805					36.8833		397.414	356.37	334.589	338.409	411.972	322.943	346.932	304.722	FCCP			288.331	319.825	308.402	209.298	296.599	259.631
	min	Av	SD	Av	SD				42.5833		410.593	358.077	338.049	322.598	434.855	343.675	347.769	303.854				274.69	312.63	307.795	241.45	298.106	215.217
	1.35	212.754	9.12733	219.036	10.4293				48.2667		386.524	333.886	313.989	304.852	421.033	335.672	331.831	289.585				247.022	292.154	300.63	255.992	280.035	151.775
	7.1	215.715	9.84074	225.623	10.662				54.1		57.9169	46.7873	56.1108	47.2966	37.0572	57.5172	52.5607	56.6863	AA Rotetone			45.68	53.5399	51.0527	50.833	48.243	45.2949
	12.85	194.564	9.04261	205.11	10.0695				59.75		62.6724	45.2615	55.5504	44.2963	35.22	55.6639	52.7964	52.3162				44.8827	49.3237	52.0106	47.7606	48.0474	43.8088
	18.75	81.658	3.90101	82.8438	13.5738				65.4333		70.0584	45.7613	62.3464	44.2616	35.8138	57.4691	51.9498	51.8347				45.9702	49.1547	52.7203	47.6658	47.2406	43.8355
	24.4333	75.5087	3.924	77.6982	7.67126
	31.0667	69.7753	3.9698	72.7008	6.01571				ave last 3		63.5493	45.9367	58.0025	45.2848	36.0303	56.8834	52.4356	53.6124
	36.8833	280.348	40.3748	351.669	36.3914
	42.5833	274.981	39.3069	357.434	44.0181
	48.2667	254.601	54.4212	339.671	43.5997
	54.1	49.1073	3.26921	51.4916	7.32059				Calculation based on the RAW data
	59.75	47.6389	2.97987	50.4721	8.52152
	65.4333	47.7645	3.01442	52.4369	10.8388					Non-mito respiration			Basal Respiration						Proton leak						ATP production			Max respiration						Spare respiratory capacity			Coupling efficiency
										last 3 readings			first 3 readings			first read - last readin			3 readings after oli			3 after oli-last 3			Basel Resp - Proton leak			3 readings after FCCP			FCCP-last readings			Max resp - Basel Resp			100 x ATP prod/non-mito resp
										C	mmu-CR805		C	mmu-CR805		C	mmu-CR805		C	mmu-CR805		C	mmu-CR805		C	mmu-CR805		C	mmu-CR805		C	mmu-CR805		C	mmu-CR805		C	mmu-CR805
										45.68	57.9169		217.55	228.298		171.87	170.381		76.5253	90.7738		30.8453	32.8569		141.025	137.524		288.331	397.414		242.651	339.497		70.7809	169.116		308.724	237.451
										44.8827	62.6724		221.16	235.733		176.277	173.061		70.5189	82.6447		25.6362	19.9723		150.641	153.088		274.69	410.593		229.807	347.921		53.5299	174.86		335.632	244.267
										45.9702	70.0584		196.33	215.831		150.359	145.773		64.0195	75.9078		18.0492	5.84939		132.31	139.924		247.022	386.524		201.052	316.466		50.6926	170.693		287.817	199.724
										53.5399	46.7873		220.253	217.886		166.713	171.098		85.1122	83.9027		31.5722	37.1154		135.14	133.983		319.825	356.37		266.285	309.583		99.5722	138.484		252.411	286.366
										49.3237	45.2615		221.937	225.828		172.613	180.567		78.2693	76.6103		28.9456	31.3489		143.668	149.218		312.63	358.077		263.307	312.816		90.6936	132.249		291.275	329.68
										49.1547	45.7613		197.846	205.508		148.692	159.746		71.8556	69.7497		22.7009	23.9884		125.991	135.758		292.154	333.886		242.999	288.124		94.3071	128.378		256.315	296.665
										51.0527	56.1108		217.787	208.833		166.734	152.722		87.2378	87.696		36.185	31.5852		130.549	121.137		308.402	334.589		257.349	278.478		90.6152	125.756		255.714	215.889
										52.0106	55.5504		218.163	216.45		166.152	160.899		81.5902	80.387		29.5796	24.8367		136.572	136.063		307.795	338.049		255.784	282.499		89.6323	121.599		262.586	244.936
										52.7203	62.3464		198.183	196.015		145.462	133.668		75.6298	75.0629		22.9095	12.7165		122.553	120.952		300.63	313.989		247.91	251.642		102.448	117.974		232.459	194
										50.833	47.2966		213.816	207.297		162.983	160		81.0455	81.6418		30.2125	34.3452		132.77	125.655		209.298	338.409		158.465	291.113		-4.51816	131.112		261.189	265.674
										47.7606	44.2963		222.896	213.361		175.135	169.064		75.2994	74.2003		27.5389	29.904		147.596	139.16		241.45	322.598		193.689	278.301		18.5538	109.237		309.034	314.158
										47.6658	44.2616		204.266	195.103		156.601	150.841		70.7641	69.029		23.0983	24.7673		133.502	126.074		255.992	304.852		208.326	260.59		51.7254	109.749		280.08	284.838
										48.243	37.0572		211.977	232.668		163.734	195.611		79.3438	50.845		31.1008	13.7878		132.633	181.823		296.599	411.972		248.356	374.915		84.6216	179.304		274.928	490.656
										48.0474	35.22		213.178	234.977		165.13	199.757		73.0528	61.6973		25.0055	26.4773		140.125	173.28		298.106	434.855		250.058	399.635		84.928	199.877		291.639	491.994
										47.2406	35.8138		193.092	213.14		145.852	177.326		67.4602	61.811		20.2196	25.9972		125.632	151.329		280.035	421.033		232.795	385.219		86.9428	207.893		265.941	422.543
										45.2949	57.5172		195.14	228.653		149.845	171.136		80.6834	95.0588		35.3886	37.5416		114.457	133.595		259.631	322.943		214.336	265.426		64.4911	94.2898		252.692	232.269
										43.8088	55.6639		196.957	238.442		153.149	182.778		74.3215	87.8525		30.5127	32.1886		122.636	150.59		215.217	343.675		171.408	288.011		18.2598	105.232		279.934	270.534
										43.8355	57.4691		177.666	217.938		133.83	160.469		68.9228	82.2741		25.0874	24.805		108.743	135.664		151.775	335.672		107.94	278.203		-25.8906	117.734		248.07	236.064
											52.5607			221.732			169.172			87.4388			34.8781			134.294			346.932			294.372			125.2			255.502
											52.7964			228.64			175.843			80.4698			27.6734			148.17			347.769			294.972			119.129			280.644
											51.9498			205.742			153.793			74.94			22.9901			130.802			331.831			279.882			126.089			251.786
											56.6863			206.921			150.235			85.3932			28.7069			121.528			304.722			248.035			97.8005			214.387
											52.3162			211.55			159.234			77.724			25.4078			133.826			303.854			251.538			92.3038			255.803
											51.8347			191.606			139.771			72.8323			20.9975			118.773			289.585			237.75			97.979			229.138
									Ave	48.1702	51.4669					159.507	165.123					27.4771	26.2807		132.03	138.842		269.977	349.591		228.505	298.124		62.2992	134.524		274.802	281.04
									SD	2.9825	8.65087					11.9948	16.1262					4.98562	7.75943		10.8812	15.5896		43.9907	40.3538		42.2513	43.5653		37.958	33.0989		25.9164	80.5499
									p	0.130152						0.221914						0.571324			0.120924						1.28639e-06			1.16257e-07			0.673671

## Sheet: BEAS-2B mito stress test I
Supplementary Table 3. Seahorse analysis of Mitochondrial Bioenergetics Activity
Experiment data											Time in min		mmu-ncR805FL							Ave	mmu-CR805					Ave		C negative					Ave			H-LDL-1
presented in figure 4E											1.35		204.185	199.686	224.211	211.143	220.247	218.205		212.946	238.329	219.217	224.829	228.348		227.681		158.039	170.253	170.194	185.605	172.984	171.415			243.175	182.614	235.208	211.689	196.038			213.745
										OCR %	7.1		194.484	183.582	204.766	203.411	200.821	195.361		197.071	221.329	198.514	205.303	207.753		208.225		146.048	200.512	211.358	184.289	172.879	183.017			213.255	213.401	211.588	188.507				206.688
											12.85		194.414	182.887	203.939	202.675	195.956	194.768		195.773	220.152	196.024	203.923	203.317		205.854		150.338	171.372	185.22	169.217		169.037			211.48	211.809	208.452	187.752				204.873
											18.75		100	100	100	100	100	100	Oligomycin	100	100	100	100	100	Oligomycin	100		100	100	97.4328	102.28	112.038	102.35			100	100	100	100	100		Oligomycin	100
											24.4333		95.1094	92.786	102.881	107.442	89.6619	90.4113		96.3818	102.509	92.1995	94.3263	97.0882		96.5309		91.0491	100	100	100	106.805	99.5708			102.189	104.648	100.857	94.5739				100.567
											31.0667		107.694	101.695	118.355	126.021	100.497	101.841		109.351	117.772	102.939	111.034	115.813		111.889		102.813	84.7232	88.6579	97.6781		93.4681			117.861	120.819	116.055	110.602				116.334
											36.8833		322.119	331.11	342.983	412.218	395.474	365.955	FCCP	361.643	386.108	312.01	417.193	339.234	FCCP	363.636		215.745	242.768	280.749	297.578	280.623	263.493			323.261	283.661	407.981	355.403	329.636		FCCP	339.988
											42.5833		307.726	324.003	341.209	379.485	343.524	333.559		338.251	371.197	319.629	394.842	336.719		355.597		226.778	262.034	296.338	265.432	291.449	268.406			330.903	363.704	392.512	340.351				356.867
											48.2667		311.883	309.16	341.804	393.951	330.048	331.832		336.446	361.743	322.166	371.519	325.164		345.148		236.514	280.236	300.858	276.579		273.547			356.484	373.688	380.171	333.12				360.866
											54.1		79.7795	70.1601	77.721	80.2882	66.0924	57.7064	AA Rotetone	71.9579	66.4384	56.1207	52.7059	54.8671	AA Rotetone	57.533		56.9739	60.8861	48.4205	60.8016	63.9354	58.2035			76.4186	52.418	72.8995	75.0424	49.0888		AA Rotetone	65.1735
											59.75		65.7419	60.9423	69.2995	71.3683	58.6513	55.9008		63.6507	64.9378	54.2729	51.2454	54.4281		56.221		56.6828	50.7245	70.5227	69.5158	62.6367	62.0165			63.7412	69.009	64.6045	63.6808				65.2589
	Table with average values of OCR% in each group BEAS-2B										65.4333		61.4786	62.3732	65.8803	67.2479	55.8467	54.0554		61.147	61.5734	51.8835	52.8443	54.869		55.2925		51.5256	47.3986	64.0737	65.2095		57.0519			58.9036	61.6064	60.0462	60.8806				60.3592
												ave last 3	69	64.4919	70.9669	72.9682	60.1968			ave last 3	64.3165	54.0923	52.2652	54.7214			ave last 3	55.0608	53.0031	61.0056	65.1756	63.2861				66.3545	61.0111	65.8501	66.5346
	Time	Neg Control		mmu-ncR805FL		mmu-CR805		H-LDL-1	M-Long-805
	min	Av	SD	Av	SD	Av	SD	Av	SD
	1.35	189.667	20.3215	212.946	9.62995	227.681	8.03339	213.745	25.562			Calculation based on the RAW data
	7.1	168.468	14.9813	197.071	7.81068	208.225	9.57043	206.688	12.1484			Non-mito respiration
	12.85	169.864	13.6451	195.773	7.52682	205.854	10.1854	204.873	11.5138										Basal Respiration												Proton leak													ATP production
	18.75	100	0	100	0	100	0	100	0			last 3 readings							first 3 readings						first read - last readin						3 readings after oli						3 after oli-last 3							Basel Resp - Proton leak
	24.4333	89.6316	6.14182	96.3818	7.20985	96.5309	4.46003	100.567	4.29307			mmu-CR805	C neg	hsa-HDL-1	mmu-ncR805FL				mmu-CR805	C neg	HDL-1	mmu-ncR805FL			mmu-CR805	C neg	HDL-1	mmu-ncR805FL			mmu-CR805	C neg	HDL-1	mmu-ncR805FL			mmu-CR805	C neg	HDL-1	mmu-ncR805FL				mmu-CR805	C neg	HDL-1	mmu-ncR805FL
	31.0667	102.805	6.54772	109.351	10.5369	111.889	6.60375	116.334	4.29648			66.4384	56.9739	76.4186	79.7795				238.329	158.039	243.175	204.185			171.891	101.065	166.756	124.406			100	100	100	100			33.5616	43.0261	23.5814	20.2205				138.329	58.0387	219.593	104.185
	36.8833	269.271	34.7076	361.643	36.2314	363.636	47.0249	339.988	45.8811			64.9378	56.6828	63.7412	65.7419				221.329	146.048	213.255	194.484			156.392	89.3648	149.514	128.742			102.509	91.0491	102.189	95.1094			37.5717	34.3663	38.4481	29.3675				118.82	54.9985	174.807	99.3748
	42.5833	281.971	26.4239	338.251	24.0564	355.597	33.8311	356.867	27.4725			61.5734	51.5256	58.9036	61.4786				220.152	150.338	211.48	194.414			158.579	98.8127	152.576	132.936			117.772	102.813	117.861	107.694			56.1984	51.2878	58.9573	46.215				102.38	47.5249	152.523	86.7207
	48.2667	283.174	22.3938	336.446	30.8077	345.148	25.1553	360.866	21.0249			56.1207	60.8861	52.418	70.1601				219.217	170.253	182.614	199.686			163.096	109.366	130.196	129.526			100	100	96.8358	100			43.8793	39.1139	44.4177	29.8399				119.217	70.2525	138.196	99.686
	54.1	66.8756	11.5895	71.9579	8.99472	57.533	6.10215	65.1735	13.2755			54.2729	50.7245	69.009	60.9423				198.514	200.512	213.401	183.582			144.241	149.787	144.392	122.64			92.1995	100	104.648	92.786			37.9266	49.2755	35.6395	31.8437				106.315	100.512	177.761	90.7962
	59.75	60.4092	7.53759	63.6507	6.13569	56.221	5.99302	65.2589	2.53542			51.8835	47.3986	61.6064	62.3732				196.024	171.372	211.809	182.887			144.141	123.973	150.202	120.514			102.939	84.7232	120.819	101.695			51.0558	37.3245	59.2122	39.3213				93.0847	86.6489	152.597	81.1923
	65.4333	57.6177	6.51489	61.147	5.28437	55.2925	4.36823	60.3592	1.16106			52.7059	48.4205	72.8995	77.721				224.829	170.194	235.208	224.211			172.124	121.773	162.308	146.49			100	97.4328	100	100			47.2941	49.0123	27.1005	22.279				124.829	72.7608	208.107	124.211
												51.2454	70.5227	64.6045	69.2995				205.303	211.358	211.588	204.766			154.058	140.836	146.983	135.467			94.3263	100	100.857	102.881			43.0809	29.4773	36.2524	33.5811				110.977	111.358	175.335	101.886
												52.8443	64.0737	60.0462	65.8803				203.923	185.22	208.452	203.939			151.079	121.147	148.406	138.059			111.034	88.6579	116.055	118.355			58.19	24.5842	56.0093	52.4751				92.8891	96.5625	152.442	85.5835
												54.8671	60.8016	75.0424	80.2882				228.348	185.605	211.689	211.143			173.481	124.804	136.647	130.855			100	102.28	100	100			45.1329	41.4783	24.9576	19.7118				128.348	83.3253	186.732	111.143
												54.4281	69.5158	63.6808	71.3683				207.753	184.289	188.507	203.411			153.325	114.773	124.826	132.042			97.0882	100	94.5739	107.442			42.6602	30.4842	30.8931	36.0734				110.665	84.289	157.614	95.9688
												54.869	65.2095	60.8806	67.2479				203.317	169.217	187.752	202.675			148.448	104.007	126.871	135.427			115.813	97.6781	110.602	126.021			60.9436	32.4685	49.7211	58.7735				87.5045	71.5386	138.031	76.6539
													63.9354	49.0888	66.0924					172.984	196.038	220.247				109.048	146.949	154.154				112.038	100	100				48.1028	50.9112	33.9076					60.9454	145.127	120.247
													62.6367		58.6513					172.879		200.821				110.243		142.17				106.805		89.6619				44.1684		31.0106					66.0744		111.159
															55.8467							195.956						140.11						100.497						44.6507							95.4591
															57.7064							218.205						160.498						100						42.2936							118.205
															55.9008							195.361						139.46						90.4113						34.5105							104.95
															54.0554							194.768						140.713						101.841						47.786							92.927
											Ave	56.3489	59.2362	63.7184	65.5852				213.92	174.879	208.844	201.93		Ave	157.571	116.058	209.911	134.236		Ave	102.807	98.8198	104.957	101.911		Ave	46.4579	39.5836	41.2386	36.3256		Ave		111.113	76.0592	167.605	100.019		Ave
											SD	5.1065	7.50181	8.13175	8.10479				13.2357	17.7823	17.4544	11.2438		SD	10.5171	16.8938	17.7821	9.06955		SD	8.03145	7.0108	8.5135	8.91947		SD	8.61546	8.42134	12.8406	10.8357		SD		15.5651	18.5486	25.7408	13.4532		SD
											p	0.271008		0.148754	0.0305633				1.818e-06		3.69798e-05	1.13322e-05		p value	7.08947e-08		2.11781e-05	0.000134546		p value	0.18897		0.0359556	0.221221		p value	0.0511096		0.693342	0.361307		p value		2.72466e-05		8.66013e-11	0.000197488		p value
												c/CR805		c/HDL-1	C/ncR805FL				c/CR805		c/HDL-1	C/ncR805FL			c/CR805		c/HDL-1	C/ncR805FL			c/CR805		c/HDL-1	C/ncR805FL			c/CR805		c/HDL-1	C/ncR805FL				c/CR805		c/HDL-1	C/ncR805FL
[truncated: 20 more columns]

## Sheet: BEAS-2B mito stress test II
											Time in min		mmu-ncR805FL								mmu-CR805							C negative								H-LDL-1
											1.35		185.932	173.183	212.652	218.379	177.479	198.391			218.253	191.794	211.826	197.107	179.342			127.654	142.541	152.467	156.501	127.654	165.372			182.697	170.534	198.745	181.848	200.041	218.257
										OCR %	7.1		167.06	159.543	192.196	203.824	164.719	179.953			198.296	181.116	193.723	180.1	165.35			118.004	128.949	141.506	147.571	118.004	158.639			167.738	156.746	183.857	167.517	176.535	195.292
											12.85		161.986	156.486	188.1	199.71	161.866	175.296			192.431	180.332	187.974	175.642	162.157			115.283	127.02	136.987	146.184	115.283	159.741			165.358	153.076	181.628	164.307	172.703	191.647
											18.75		100	100	100	100	100	100	Oligomycin		100	100	100	100	100	Oligomycin		100	100	100	100	100	100	Oligomycin		100	100	100	100	100	100	Oligomycin
											24.4333		77.6923	69.6719	82.0206	96.0399	81.8195	84.3424			94.3314	95.4061	87.277	85.9719	83.3469			73.2447	68.7912	76.9843	76.5772	73.2447	84.2926			82.9913	75.6551	93.1952	78.6866	86.9309	94.8273
											31.0667		79.46	71.2485	86.0819	108.623	88.7611	88.5911			101.736	106.372	94.421	92.4989	86.3314			56.2477	63.2722	75.2708	80.7204	56.2477	91.744			82.619	76.705	99.0104	77.5352	91.2344	97.1906
											36.8833		339.618	314.225	405.611	353.711	289.661	363.619	FCCP		377.576	325.241	397.153	352.428	315.746	FCCP		238.208	231.817	252.466	269.565	238.208	340.127	FCCP		299.163	293.466	311.078	326.349	324.302	357.454	FCCP
											42.5833		327.929	309.801	387.243	329.7	280.972	342.006			365.619	320.81	368.688	321.737	308.164			225.161	237.174	260.306	267.317	225.161	328.008			293.125	283.116	304.391	321.795	309.652	348.65
											48.2667		319.258	302.125	375.586	326.204	270.659	328.842			349.855	311.672	350.102	308.09	294.168			216.36	235.357	252.887	264.228	216.36	319.333			290.09	283.169	305.059	315.93	299.954	326.708
											54.1		55.8988	49.243	63.8777	83.1272	63.0074	58.6256	AA Rotetone		69.8204	66.1016	66.7449	66.2165	58.4457	AA Rotetone		38.9543	39.6945	49.3293	56.8566	38.9543	53.9083	AA Rotetone		77.0502	67.0514	93.4221	71.1131	73.8509	76.516	AA Rotetone
											59.75		53.4163	47.7858	57.9117	70.6105	54.9478	55.3889			65.7707	64.572	60.2994	56.6736	52.3371			37.6323	37.4204	46.8586	52.8803	37.6323	51.5985			67.6526	58.3819	77.3108	61.7031	64.6173	71.507
	Table with average values of OCR% in each group BEAS-2B										65.4333		51.9909	45.7201	55.0742	64.7295	51.8333	54.0568			62.6904	62.0534	58.0935	53.5959	49.9873			36.0489	37.5838	45.6259	49.9584	36.0489	48.7235			62.7531	53.7397	71.6299	59.0627	59.6223	67.3697
												ave last 3	53.7687	47.5829	58.9545	72.8224	56.5961			ave last 3	66.0939	64.2423	61.7126	58.8287	53.59		ave last 3	51.4101	120.802	37.5452	38.2329	47.2713	53.2318				69.152	59.7243	80.7876	63.9596	66.0302	71.7975
	Time	Neg Control		mmu-ncR805FL		mmu-CR805		H-LDL-1	M-Long-805
	min	Av	SD	Av	SD	Av	SD	Av	SD
	1.35	145.365	15.5566	194.336	18.613	199.664	15.612	192.02	17.0292			Calculation based on the RAW data
	7.1	135.446	16.5669	177.883	17.3717	183.717	12.9409	174.614	13.6648			Non-mito respiration
	12.85	133.416	17.7049	173.907	17.0867	179.707	11.7807	171.453	13.7027										Basal Respiration												Proton leak													ATP production
	18.75	100	0	100	0	100	0	100	0			last 3 readings							first 3 readings						first read - last readin						3 readings after oli						3 after oli-last 3							Basel Resp - Proton leak
	24.4333	75.5225	5.21251	81.9311	8.63884	89.2667	5.31984	85.3811	7.7177			mmu-CR805	C neg	hsa-HDL-1	mmu-ncR805FL				mmu-CR805	C neg	HDL-1	mmu-ncR805FL			mmu-CR805	C neg	HDL-1	mmu-ncR805FL			mmu-CR805	C neg	HDL-1	mmu-ncR805FL			mmu-CR805	C neg	HDL-1	mmu-ncR805FL				mmu-CR805	C neg	HDL-1	mmu-ncR805FL
	31.0667	70.5838	14.4012	87.1276	12.4811	96.272	7.87961	87.3824	9.79707			69.8204	38.9543	77.0502	55.8988				218.253	127.654	182.697	185.932			148.433	88.6998	105.647	130.033			100	100	100	100			30.1796	61.0457	22.9498	44.1012				118.253	27.6541	159.748	85.9317
	36.8833	261.732	40.7299	344.408	40.3301	353.629	34.3156	318.635	23.1011			65.7707	37.6323	67.6526	53.4163				198.296	118.004	167.738	167.06			132.526	80.3721	100.086	113.644			94.3314	73.2447	82.9913	77.6923			28.5606	35.6124	15.3387	24.276				103.965	44.7597	152.399	89.3681
	42.5833	257.188	38.9354	329.608	35.3159	337.003	28.0612	310.122	23.1168			62.6904	36.0489	62.7531	51.9909				192.431	115.283	165.358	161.986			129.74	79.2337	102.605	109.995			101.736	56.2477	82.619	79.46			39.0457	20.1989	19.8659	27.4692				90.6946	59.0348	145.492	82.5258
	48.2667	250.755	38.7096	320.446	34.525	322.777	25.6777	303.485	16.1324			66.1016	39.6945	67.0514	49.243				191.794	142.541	170.534	173.183			125.693	102.846	103.482	123.94			100	100	100	100			33.8984	60.3055	32.9486	50.757				91.7942	42.5409	137.585	73.1835
	54.1	46.2829	8.12472	62.2966	11.5041	65.4658	4.20856	76.5006	9.07714			64.572	37.4204	58.3819	47.7858				181.116	128.949	156.746	159.543			116.544	91.529	98.364	111.757			95.4061	68.7912	75.6551	69.6719			30.8341	31.3708	17.2732	21.8861				85.7096	60.1583	139.473	89.8711
	59.75	44.0038	7.33695	56.6768	7.61581	59.9306	5.56901	66.8621	6.85484			62.0534	37.5838	53.7397	45.7201				180.332	127.02	153.076	156.486			118.279	89.4363	99.3365	110.766			106.372	63.2722	76.705	71.2485			44.3189	25.6884	22.9653	25.5285				73.9597	63.7479	130.111	85.2373
	65.4333	42.3316	6.50176	53.9008	6.22108	57.2841	5.46526	62.3629	6.3853			66.7449	49.3293	93.4221	63.8777				211.826	152.467	198.745	212.652			145.081	103.138	105.323	148.775			100	100	100	100			33.2551	50.6707	6.57789	36.1223				111.826	52.4668	192.167	112.652
												60.2994	46.8586	77.3108	57.9117				193.723	141.506	183.857	192.196			133.424	94.6476	106.547	134.284			87.277	76.9843	93.1952	82.0206			26.9776	30.1257	15.8844	24.1089				106.446	64.5219	167.973	110.175
												58.0935	45.6259	71.6299	55.0742				187.974	136.987	181.628	188.1			129.881	91.3613	109.998	133.026			94.421	75.2708	99.0104	86.0819			36.3275	29.6449	27.3804	31.0076				93.5531	61.7164	154.248	102.019
												66.2165	56.8566	71.1131	83.1272				197.107	156.501	181.848	218.379			130.891	99.6442	110.735	135.252			100	100	100	100			33.7835	43.1434	28.8869	16.8728				97.107	56.5008	152.961	118.379
												56.6736	52.8803	61.7031	70.6105				180.1	147.571	167.517	203.824			123.426	94.6911	105.814	133.214			85.9719	76.5772	78.6866	96.0399			29.2983	23.6968	16.9836	25.4294				94.1281	70.9943	150.533	107.785
												53.5959	49.9584	59.0627	64.7295				175.642	146.184	164.307	199.71			122.046	96.2253	105.245	134.981			92.4989	80.7204	77.5352	108.623			38.9029	30.762	18.4725	43.8934				83.1434	65.4633	145.835	91.0873
												58.4457	38.9543	73.8509	63.0074				179.342	127.654	200.041	177.479			120.896	88.6998	126.19	114.472			100	100	100	100			41.5543	61.0457	26.1491	36.9926				79.3417	27.6541	173.892	77.4791
												52.3371	37.6323	64.6173	54.9478				165.35	118.004	176.535	164.719			113.013	80.3721	111.917	109.771			83.3469	73.2447	86.9309	81.8195			31.0098	35.6124	22.3136	26.8717				82.0034	44.7597	154.221	82.8997
												49.9873	36.0489	59.6223	51.8333				162.157	115.283	172.703	161.866			112.17	79.2337	113.081	110.033			86.3314	56.2477	91.2344	88.7611			36.3441	20.1989	31.6121	36.9278				75.8261	59.0348	141.091	73.1053
													53.9083	76.516	58.6256					165.372	218.257	198.391				111.463	141.741	139.765				100	100	100				46.0917	23.484	41.3744					65.3716	194.773	98.391
													51.5985	71.507	55.3889					158.639	195.292	179.953				107.041	123.785	124.564				84.2926	94.8273	84.3424				32.6941	23.3204	28.9534					74.3468	171.972	95.6103
													48.7235	67.3697	54.0568					159.741	191.647	175.296				111.017	124.277	121.239				91.744	97.1906	88.5911				43.0205	29.8209	34.5343					67.9968	161.826	86.7048
											Ave	60.8935	44.2061	68.5752	57.6247				187.696	138.076	179.363	182.042		Ave	126.803	90.6753	174.889	123.596		Ave	95.1795	82.0354	90.9212	89.6862		Ave	34.286	37.8294	22.346	32.0615		Ave		92.5168	56.0402	157.017	92.3558		Ave
											SD	5.90814	7.10336	9.32049	8.96002				15.3865	16.5213	16.7935	18.956		SD	10.5752	8.15592	13.5666	12.7722		SD	6.85835	15.6253	9.4917	11.3511		SD	5.05618	13.4919	6.66362	9.0598		SD		13.175	13.5848	17.7171	13.441		SD
											p	3.79861e-08		2.60446e-10	1.82883e-05				5.30405e-10		1.26371e-08	1.3282e-08		p value	4.12941e-10		4.98082e-05	2.16992e-09		p value	0.00504476		0.0224316	0.0535401		p value	0.344283		0.000112296	0.14136		p value		8.74035e-09		8.13714e-20	2.12586e-09		p value
												c/CR805		c/HDL-1	C/ncR805FL				c/CR805		c/HDL-1	C/ncR805FL			c/CR805		c/HDL-1	C/ncR805FL			c/CR805		c/HDL-1	C/ncR805FL			c/CR805		c/HDL-1	C/ncR805FL				c/CR805		c/HDL-1	C/ncR805FL
[truncated: 20 more columns]
